# Supplementary material for: Tissue-guided LASSO for prediction of clinical drug response using preclinical samples
Source: PLoS Comput Biol. 2020 Jan 22;16(1):e1007607. doi: 10.1371/journal.pcbi.1007607 (PMC6975549; doi:10.1371/journal.pcbi.1007607)
Supplement: S7 Table — (XLSX) [file pcbi.1007607.s008.xlsx]

## Sheet: methotrexate
	Tissue Freq.	Identified using LASSO?
CAPSL	13	No
C1orf61	13	No
GPT2	13	No
RAB26	13	No
GMFG	13	No
RHOD	13	No
ZNF600	13	Yes
CMBL	13	No
FAM83A	13	No
MALAT1	13	Yes
FBP1	13	No
PABPC4L	13	No
PIM1	13	Yes
HSPA1A	13	No
ST6GALNAC5	13	No
GJB1	13	No
AIM1	13	No
CNN3	13	Yes
IGHV4-34	13	Yes
HOXB2	13	Yes
LPL	13	No
FERMT2	13	No
KCNN4	13	No
BPIFB1	13	Yes
CLDN18	13	No
CHI3L1	13	No
FAM64A	13	No
TSPAN7	13	No
EGR1	13	Yes
NRCAM	13	No
TMEM100	13	No
ASS1	13	No
ARG2	13	No
TRIB3	13	No
SDC4	13	No
DHX32	13	Yes
TPST2	13	Yes
DNER	13	No
CRYAB	13	Yes
ALPP	13	No
NPR3	13	Yes
MYCN	13	No
FAIM2	13	No
GFAP	13	No
SLC14A1	13	No
VCAM1	13	No
P4HA2	13	No
KRT23	13	No
S100A9	13	No
NTNG2	13	Yes
SLFN11	13	Yes
SOCS2	13	No
CYP2B6	13	Yes
CRYBG3	13	No
CTNND2	13	No
CEACAM5	13	No
TMOD1	13	No
PARP8	13	Yes
IGLV1-40	13	No
NUDT11	13	No
PTPRD	13	No
BEX2	13	No
CYBA	13	No
PMP2	13	No
MMP10	13	No
LPHN2	13	No
C3orf14	13	No
MME	13	No
FABP4	13	Yes
GDF15	13	No
CORO2B	13	No
TAGLN3	13	No
BMP4	13	No
GADD45B	13	Yes
MSX1	13	Yes
PCOLCE2	13	No
HSPA2	13	No
CLDN6	13	No
SPINK1	13	No
DUSP23	13	Yes
CCL19	13	No
CORO2A	13	No
C5orf30	13	Yes
SLC27A2	13	No
CXCL13	13	No
IRX4	13	No
CA2	13	No
CEBPD	13	No
SCGN	13	No
MOK	13	No
GPM6A	13	No
CXCL12	13	Yes
CST2	13	No
TMTC1	13	No
ADCY8	13	No
TCEAL3	13	No
KCNJ16	13	No
ST6GAL2	13	Yes
NNMT	13	No
STOM	13	No
CKS2	13	No
SLC7A3	13	No
BRINP2	13	No
GLDC	13	No
COMP	13	No
EXOC3L2	13	No
ALPPL2	13	No
CHMP4C	13	No
NNAT	13	No
PI3	13	No
EDNRB	13	No
GTSF1	13	No
IGF2BP1	13	No
RHOBTB3	13	No
MAMDC2	13	Yes
ANPEP	13	No
RELN	13	No
KBTBD11	13	Yes
KISS1	13	No
ATF5	13	No
CADM2	13	No
XIST	13	No
TM4SF1	12	No
EPHB6	12	Yes
LDHB	12	No
CDH10	12	No
DUSP10	12	No
SLC7A5	12	Yes
LCP2	11	No
LAPTM5	11	Yes
P3H2	11	No
GSTA1	11	No
SFTPA2	11	No
AIM2	11	No
PHGDH	11	No
LMO2	11	Yes
COL1A2	11	No
DFNB59	11	Yes
GREM2	11	No
PRNP	11	No
SCUBE2	11	No
MARC2	11	Yes
SLAIN1	11	Yes
CLEC2B	10	No
AQP3	10	No
GZMA	10	No
CA8	10	No
SPRR3	10	No
MGP	10	No
PPM1N	10	No
HSPB8	10	No
TNS4	10	No
CFL2	10	No
S100A16	10	No
PNMA2	10	No
HTRA1	10	No
PSAT1	10	No
CYR61	10	No
CSTA	10	No
SRGN	10	No
TRBC2	9	No
GULP1	8	Yes
NMU	8	No
TFF1	8	No
AMER2	7	No
MSLN	7	No
LGALS3	7	No
SYNDIG1	7	No
LCP1	7	No
IGFBP5	7	No
AGR3	7	No
CD2	7	No
PRLR	7	No
KRT8	7	No
PTPRC	7	No
PCSK1N	7	No
SPRY2	7	No
DDIT4	7	No
PJA1	6	No
OSR2	6	No
B3GALT2	6	Yes
ADSSL1	6	No
SMAD1	6	No
CDH4	6	No
CILP	6	No
NCCRP1	6	No
PADI2	6	No
GMPR	6	No
CAPN6	6	No
CHST9	6	No
SLCO4C1	6	No
TRIM29	6	No
RASGEF1A	6	No
CTD-2033A16.2	6	Yes
CADPS	6	No
DPP4	6	No
CDH26	6	No
ABCG1	6	No
GALNT15	6	No
NTRK3	6	No
LGR5	6	No
HDDC3	6	Yes
MAGEA1	6	No
STEAP4	6	No
MYT1	6	No
XYLT1	6	No
ANK3	6	No
PSMB9	6	No
IGDCC4	6	No
RERGL	6	No
IL13RA2	6	No
MAP6D1	6	No
LINC00205	6	No
IGLL5	6	No
SLC35F1	6	No
PPP1R3C	6	No
ALB	6	No
SMOC2	6	No
NUP62CL	6	No
SLC1A1	6	No
CHST11	6	No
RGMA	6	No
HOPX	6	No
PXDN	6	No
NAV1	6	No
RBP4	6	No
TRIP13	6	No
GNG12	6	Yes
STEAP1B	5	No
SLC16A14	5	No
EPB41L3	5	No
TCF21	5	No
GNGT1	5	No
PPAPDC1A	5	No
F3	5	No
SULF2	5	No
ANXA4	5	No
C2CD4B	5	Yes
CDX1	5	No
DOCK10	5	No
IGLV8-61	5	No
PHACTR3	5	No
SCGB2A2	5	No
ASTN1	5	No
CTNNAL1	5	No
GATA4	5	No
RERG	5	No
NTS	5	No
GABBR2	5	No
TSPAN8	5	No
NLGN4X	5	No
FKBP1B	5	No
IRX2	5	No
INHA	5	No
TRIM31	5	No
FPR1	5	No
CEACAM6	5	No
DPEP1	5	No
SFTPA1	5	No
NDNF	5	No
PLLP	5	No
ANTXR2	5	No
SLC38A4	4	No
IL2RB	4	No
CXCL5	4	No
FAM49A	4	No
IL7R	4	No
CDKN2A	4	No
CLCA2	4	No
EVA1A	4	Yes
SLC16A3	4	No
CCL21	4	No
KRT6B	4	No
WSCD1	4	No
RARRES3	4	No
HBEGF	4	No
TRPA1	4	No
GPHN	4	No
ADH1B	4	No
SPRY4	4	Yes
ATP1A2	4	No
TEAD4	4	No
TMEM47	4	No
SALL3	4	No
ACTL8	4	No
C1orf228	4	No
CCL13	4	No
E2F7	4	No
ATP11C	4	No
TMEM200A	4	No
FAM81A	4	No
PPP2R2C	4	No
LEFTY2	4	No
CD52	4	No
TFF3	3	No
FGB	3	No
ITGA2	3	No
SYT12	3	No
PBK	3	No
SEPT8	3	No
CAMP	3	No
APOA2	3	No
SIX1	3	No
ITGB1	3	No
RHOU	3	No
ICA1	3	No
CHKA	3	Yes
GPER1	3	No
FGFR3	3	No
IL22RA1	3	No
SLITRK6	3	No
SIMC1	3	No
APOBEC3B	3	No
TTR	3	No
SFRP1	3	No
PLAA	3	No
LRRK2	3	No
PAQR8	3	No
ROGDI	3	No
ANXA10	3	No
GABRA3	3	No
CXCL17	3	No
LYSMD2	3	No
LYPD1	3	No
COL23A1	3	No
ALDH1A1	3	No
SERPINA1	3	No
IL18R1	3	No
BMPER	3	No
SLC22A18AS	3	No
ADAM22	3	No
PRKAR2B	3	No
CYP26A1	3	No
GPR27	3	No
BAK1	3	No
POMC	3	No
ANXA5	3	No
CPNE8	3	No
OCIAD2	3	No
HORMAD1	3	No
TSPAN12	3	No
FASN	3	No
CRTAC1	3	No
C15orf48	3	No
NAT8L	3	No
CYP4B1	3	No
C4BPB	3	No
CFH	3	No
MDH1B	3	No
CPA3	3	No
PRAME	3	No
SFTPD	3	No
CYP24A1	3	No
LRRC4C	3	No
P2RY1	3	No
CA4	3	No
ABHD15	3	Yes
C8orf4	3	No
SYCE1L	3	No
GSPT2	3	No
MS4A15	3	No
TXN	3	No
GRIA1	3	No
NRIP1	3	No
PLEKHM1	3	No
TRABD2A	3	No
SPP1	3	No
MEIS2	3	No
ALDH1A3	3	No
TTYH1	3	No
CCL2	3	No
CMTM3	3	No
AOX1	3	No
RP11-66B24.2	3	No
CEP135	3	No
SNCA	3	No
CAV2	3	No
XKR9	3	No
PARP3	3	No
CRB3	3	No
CNRIP1	3	No
RAB34	3	No
VWA7	3	No
NTM	3	No
PAQR6	3	No
TYMP	3	No
AKR1C2	3	No
COL4A1	3	No
PLS1	3	No
FRMD5	3	No
ELOVL2	3	No
BTG3	3	No
TFF2	3	No
SYNM	3	No
GNB3	3	No
RPS4Y1	3	No
BTBD11	3	No
AKR7A3	3	No
SEMA3F	3	No
CXCL9	3	No
LIF	3	No
COL4A5	3	No
EFHD2	3	Yes
TRAPPC6A	3	No
NRARP	3	No
SLC27A5	3	Yes
TFPI2	3	No
CADM4	3	No
ROPN1L	3	No
EFS	3	No
TRIM9	3	No
CNTNAP2	3	No
PROM1	3	No
GREM1	3	No
IGF2BP2	3	No
DMRT3	3	No
SLC6A17	3	No
BATF3	3	No
KIRREL3	3	No
FZD10	3	No
CINP	3	Yes
MYO1E	3	No
PCDHB2	3	No
TM4SF4	3	No
GC	3	No
ASRGL1	3	No
KLK7	3	No
TAC3	3	No
UPK1A	3	No
SLC30A2	3	No
HPDL	3	No
NOV	3	No
SHISA2	3	No
ENPP3	3	No
SCN3A	3	No
SFRP5	3	No
WBSCR17	3	No
TACSTD2	3	No
HSPA6	3	No
FAM163B	3	No
LINC00885	3	No
APOBEC3A	3	Yes
SCN2A	3	No
CORO1A	3	No
DHRS2	3	No
OLFM4	3	No
SLC1A2	3	No
VAMP5	3	No
CKB	3	No
OPCML	3	No
CCL7	3	No
PCDH9	3	No
HLA-DRA	3	No
HTR3A	3	No
C5orf46	3	No
LANCL2	3	No
GUCY1A2	3	No
EDN2	3	No
F2RL2	3	No
AP1M2	3	No
GFRA2	3	No
ADAM23	3	No
TRIP6	3	No
OTX1	3	No
APBA2	3	No
VCAN	3	No
LMO1	3	Yes
TMEM151A	3	No
TMEM35	3	No
LRRC17	3	No
VSTM2B	3	No
CLPSL1	3	No
GAL	3	No
CAPS	3	No
PTGER4	3	No
ASAP1	3	No
ZCCHC18	3	No
F13A1	3	No
FGF12	3	No
TLE1	3	No
IGHV3-13	3	No
PADI3	3	No
TESC	3	No
FOS	3	No
CDHR5	3	No
RPL27A	3	No
NETO2	3	No
IQCG	3	No
PPAPDC3	3	No
ST3GAL6	3	No
DCDC2	3	No
SMIM24	3	No
TMEM178A	3	No
AADAC	3	No
KCTD1	3	No
USP2	3	No
JPH3	3	No
FOXC1	3	No
NPDC1	3	No
THBS4	3	No
NAA15	3	No
DCLK2	3	No
CDC42BPG	3	No
CDH1	3	No
IL1A	3	No
TMEM145	3	No
MTL5	3	No
C4orf33	3	No
GLI3	3	No
POU2AF1	3	No
TMEFF2	3	No
AKAP12	3	No
RIPK2	3	No
CYSTM1	3	No
FES	3	Yes
LRRC4	3	No
SPON2	3	No
CLIC4	3	No
UPP1	3	No
HPGD	3	No
VGF	3	No
LGR6	3	No
RMI2	3	No
LAMP3	2	No
VANGL2	2	No
DTD1	2	No
TFAP2C	2	No
FAM124A	2	No
MACC1	2	No
TANC2	2	No
PRSS1	2	No
LTF	2	No
NACAD	2	No
PIPOX	2	No
SLC26A11	2	No
PNOC	2	No
XKRX	2	No
GPNMB	2	No
CNKSR3	2	No
THOC5	2	No
CCND2	2	No
NXNL2	2	Yes
REG3A	2	No
FAM183A	2	No
PCLO	2	No
PLAC8	2	No
TNFRSF4	2	No
BHMT2	2	No
ROBO1	2	No
APOF	2	No
MAT1A	2	No
C6orf222	2	No
GBE1	2	No
ARHGEF28	2	No
TMEM216	2	No
BARX2	2	No
ST3GAL5	2	No
VLDLR	2	No
TMEM52	2	No
CLSTN2	2	No
COL15A1	2	No
GATA2	2	No
CCNK	2	No
KRT19	2	No
SNX22	2	No
PKP2	2	No
BMPR1B	2	No
WFDC2	2	No
WFDC1	2	No
GPR128	2	No
SEMA6D	2	No
THSD7A	2	No
ZBTB42	2	No
ESRRG	2	No
ARL6	2	No
SEPT3	2	No
MXRA5	2	No
IFI44L	2	No
FGFBP1	2	No
SULF1	2	No
SPRY1	2	No
SOCS1	2	Yes
GLB1L2	2	No
CDX2	2	No
HABP2	2	No
HOXA13	2	No
CD6	2	No
LTB	2	No
TCF4	2	No
IL27RA	2	No
ATP8B1	2	No
CDKN2C	2	No
SPRR1B	2	No
COLGALT2	2	No
ACTG2	2	No
PLA2G4A	2	No
FAM107B	2	No
CALML5	2	No
MAPK12	2	No
DYNLT3	2	No
LGALS1	2	No
OPTN	2	No
NRSN1	2	No
CALB2	2	No
RGS4	2	No
ASPRV1	2	No
CLTB	2	No
B4GALNT1	2	No
TLX1	2	No
TRPV6	2	No
CARTPT	2	No
C1orf198	2	No
APOD	2	No
VAV3	2	No
METTL7A	2	No
TUBB6	2	No
MAP2K6	2	No
P2RX7	2	No
CRNDE	2	No
B3GNT5	2	No
SLC15A1	2	No
C10orf35	2	No
NMNAT3	2	No
MT1A	2	No
ACAP1	2	Yes
PLA2G1B	2	No
PLVAP	2	No
TNNI3	2	No
ZNF57	2	No
UGT2A3	2	No
IMPA2	2	No
SLC12A7	2	No
ADRA2C	2	No
ABCA8	2	No
SSTR1	2	No
AC016747.3	2	No
TSC22D1	2	No
NBEA	2	No
KCNJ15	2	No
BMP7	2	No
ATP10A	2	No
LOXL1	1	No
NPC1L1	1	No
RDH16	1	No
SERPINA3	1	No
CYS1	1	No
CT83	1	No
FAM129A	1	No
TPSD1	1	No
LBP	1	No
TUBB2A	1	No
CHST8	1	No
PLAC9	1	No
DUOXA2	1	No
MYBPC1	1	No
PGC	1	No
SYT6	1	No
C8orf46	1	No
FXYD7	1	No
ESM1	1	No
COL4A2	1	No
NR1D1	1	No
FUT9	1	No
ZNF239	1	No
GFPT2	1	No
TGFBI	1	No
PROCR	1	No
TMEM132E	1	No
CD36	1	No
TP53	1	No
MTURN	1	No
OLIG2	1	No
KRT14	1	No
PRR18	1	No
DLL3	1	No
RAET1L	1	No
FGR	1	No
MAL	1	No
ELMOD2	1	No
DDX25	1	No
KHDRBS2	1	No
PPP1R14A	1	No
TMEM170B	1	No
COL9A3	1	No
LTBP2	1	No
CNFN	1	No
TBC1D8	1	No
G0S2	1	No
COL4A3	1	No
RIPPLY3	1	No
C1orf53	1	No
CADM3	1	No
TMEM176A	1	No
AMOT	1	Yes
SH2D2A	1	No
TLR7	1	No
CEACAM1	1	No
EPHX4	1	No
ZNF69	1	No
NFASC	1	No
EFEMP1	1	No
FRMD3	1	No
CTGF	1	No
SPTSSB	1	No
FAM181A	1	No
CST4	1	No
MUC6	1	No
MBP	1	No
CACNG4	1	No
CAAP1	1	No
SPOCK2	1	No
CYP2R1	1	No
SIGLEC12	1	No
C17orf53	1	No
HLA-DPB2	1	No
CROT	1	No
DOCK3	1	No
TIMP3	1	No
OR51E1	1	No
TFPI	1	No
SLC38A1	1	No
AKR1B10	1	No
PXYLP1	1	No
C2orf40	1	No
RAB31	1	No
DUSP6	1	No
LRFN4	1	No
WNT7A	1	No
TOR4A	1	No
SLC15A2	1	No
NAPSB	1	No
GRHPR	1	No
GPR39	1	No
TMEM98	1	No
GSTM3	1	No
ZNF610	1	No
CHST2	1	No
CACNG6	1	No
SERPINB9P1	1	No
GCH1	1	No
DLGAP3	1	No
LRRC15	1	No
MMP13	1	No
SLC52A1	1	No
TLR2	1	No
MUC17	1	No
NFIL3	1	No
PTAFR	1	No
DNAH5	1	No
GAPT	1	No
OPHN1	1	No
FADS1	1	No
MFAP5	1	No
ISG15	1	No
IGF2	1	No
NDN	1	No
FOXN3	1	No
PLEKHB1	1	No
NAPRT	1	No
ODF3B	1	No
PTER	1	No
LRRC34	1	No
TJP2	1	No
TRAV21	1	No
ID2	1	No
TUSC1	1	No
CPM	1	No
MMP9	1	No
UPK2	1	No
MUC5B	1	No
HOMER2	1	No
HLTF	1	No
EGLN3	1	No
POPDC3	1	No
FURIN	1	No
WASF3	1	No
LUM	1	No
NAP1L3	1	No
PTRHD1	1	No
PRSS22	1	No
TMEM55A	1	No
DLEU1	1	No

## Sheet: temozolomide
	Tissue Freq.	Identified using LASSO?
SLFN11	13	Yes
TSPAN8	13	Yes
SRGN	13	No
ITGB5	13	No
MIR205HG	13	No
AQP3	13	No
LAPTM4B	13	No
UCHL1	13	No
SAA1	13	No
MGMT	13	Yes
PTGR1	13	No
ZNF600	13	Yes
G0S2	13	No
CD9	13	No
BST2	13	No
PI3	13	No
FAIM2	13	Yes
MAGEH1	13	No
HOXB2	13	No
DUSP23	13	Yes
PCSK1N	13	No
TMEM47	13	No
STXBP6	13	Yes
CRYAB	13	Yes
ZNF83	13	No
DKK1	13	No
NR2F2	13	Yes
BAALC	13	No
P4HA2	13	No
TNFRSF11B	13	No
SYTL2	13	Yes
SDC4	13	No
TFF1	13	Yes
SULF1	13	Yes
IL2RB	13	Yes
SDC2	12	No
CLDN3	12	No
C19orf33	12	No
ATP8B1	11	No
SLC7A2	11	No
DEF6	11	Yes
NPTX2	11	No
BPIFB1	11	No
COL6A3	11	No
MMP7	11	No
KRT4	11	No
PPP2R2C	11	No
GPNMB	11	No
OLFM4	11	No
GEM	11	No
TMEM45A	11	No
ECHDC3	11	No
MMP3	11	No
MCTP2	11	Yes
SST	11	No
PHGDH	11	No
NMU	11	No
CTSC	11	Yes
MYL9	11	No
SLC27A5	11	No
PSAT1	11	No
PCOLCE2	11	No
SHROOM3	11	Yes
GADD45B	11	No
MAP1A	10	No
CCND1	10	No
IFIT1	10	No
HSBP1L1	10	No
NDP	10	No
HSPG2	10	No
ROPN1L	10	Yes
RPS4Y1	10	No
KRT5	10	No
KIAA1324	10	No
IGLV3-10	10	No
MUC15	10	No
IGHV1-69	10	No
WISP2	10	No
ME1	10	No
CXCL1	10	No
CIART	10	Yes
COL10A1	10	No
F3	10	No
CXCL13	10	No
TNFSF11	9	Yes
BCAT1	9	No
IRS2	9	Yes
HSPA2	9	No
SCEL	9	No
TSPYL5	9	No
MAL	9	No
GPRC5A	9	No
CDKN2C	9	No
TNFAIP8	9	Yes
CCDC3	9	Yes
IGFBP2	9	No
CAAP1	8	Yes
KCNS3	8	No
RNF128	8	No
ADCYAP1R1	8	No
S100A7	8	No
CMTM3	8	No
TMEM246	8	No
TNFSF10	8	No
TBC1D8	8	No
CD247	8	Yes
CD2	7	No
MPDZ	7	No
ASNS	7	No
GRIK5	7	No
CSTA	7	No
HIST1H4H	7	No
GPR37	6	No
HTATIP2	6	No
CXCL6	6	No
TMEM100	6	No
STX8	6	Yes
ZG16B	6	No
GDF15	6	No
PLAC1	6	No
SIX1	6	No
POU5F1	6	No
DHRS2	6	No
MT1G	6	No
GALNT3	6	No
TEAD4	6	No
FAM101A	6	Yes
TRPA1	6	Yes
SPOCK1	6	No
C15orf59	6	No
LGALS2	6	No
COL22A1	6	No
ADORA2B	6	No
TXNRD1	6	Yes
PDZK1IP1	6	No
SH3GL3	6	No
GDA	6	No
MMP11	6	No
HBB	6	No
E2F5	6	No
WLS	6	No
TIMP1	6	No
TMEM200B	6	No
AOC1	6	No
PIGR	6	No
F12	6	No
MUCL1	6	No
IGJ	6	No
CYP26A1	6	No
DNM1	6	No
FNDC1	6	No
AGR2	6	No
GPR1	6	No
ELOVL2	6	No
GPX3	6	Yes
KLK4	6	No
CPA3	6	No
ELAVL2	6	No
GPBAR1	6	Yes
THBS1	6	No
EYA1	6	No
C16orf89	5	No
FAIM3	5	No
C9orf152	5	No
KLK6	5	No
APOBEC3A	5	Yes
MT1E	5	No
ADCY8	5	No
GABRP	5	No
CCL20	5	No
PTGDS	5	No
PLA2G12B	5	No
PADI2	5	No
VEPH1	5	No
RAB27A	5	Yes
CSAG1	5	No
NQO1	5	No
KCTD14	5	No
PRSS21	5	No
MAFB	5	No
PLD1	5	No
ACPP	5	No
ZNF544	5	No
FABP7	5	No
NXPH1	4	No
UNC5A	4	No
RTN4RL1	4	No
VLDLR	4	No
SYNE4	4	No
SERTAD4	4	No
SOX1	4	No
PTGIS	4	No
HES6	4	No
CD83	4	No
PIEZO2	4	No
PCCA	4	No
LMX1B	4	No
INPP4B	4	No
CGN	4	No
CLDN2	4	No
IGLL5	4	No
PCDHB5	4	No
GFAP	4	No
FAAH2	4	No
COL2A1	4	No
ATP11C	4	No
MOXD1	4	No
RGMA	4	No
PGC	4	No
HMGA1	4	No
HLA-DQB1	4	No
TMEM171	4	No
SERPINA3	4	No
EPHB1	4	No
SCN2A	4	No
RFTN1	4	No
LRRC17	4	No
LRRC3B	4	No
BLNK	4	No
FAM131B	4	No
TFF2	4	No
PRSS16	4	No
IRX3	4	No
PLS3	4	No
DPT	4	No
AK4	4	No
IL11	4	No
MYH7	4	No
CABLES1	4	No
FAM177B	4	No
PTGER4	4	No
LIX1	4	No
MSC	4	No
KCNJ12	4	No
CHMP4C	4	No
SLAIN1	4	No
BAIAP2L1	4	No
LRRC32	4	No
IGFBP1	4	No
PLEKHG4	4	No
IGFBP4	4	No
CSRP2	4	No
LDHB	4	No
SERPINB4	4	No
CLDN6	4	No
CCRL2	4	No
GPC4	4	No
RAET1L	4	No
SLC16A9	4	No
REG1A	4	No
FAM163B	4	No
TMEM190	4	No
KANK1	4	No
PACRG	4	No
SFTPA1	4	No
TUBB4A	4	No
SLC7A3	4	No
BMP6	4	No
ENDOD1	4	No
MMP1	4	No
LMO3	4	No
TTC3P1	4	Yes
HABP2	4	No
CAPG	4	No
PARM1	4	No
DKK2	4	No
FKBP1B	4	No
FREM2	4	No
GTSF1	4	No
FGF19	4	No
CD52	4	No
THSD7A	4	No
MARCKSL1	4	No
SPATC1L	4	No
ALDH1A1	4	No
LTBP1	4	No
STC1	4	No
AKR1C3	4	No
GJB4	4	No
AKR1B10	4	No
DNAJA4	4	No
SORBS1	4	No
TMOD1	4	No
MUC6	4	No
SQLE	4	No
PITX1	4	No
GGTA1P	4	No
PBDC1	4	No
CLEC2L	4	No
GATA3	4	No
EPS8L1	4	No
SELP	4	No
AGR3	4	No
MEIS2	4	No
CTSF	4	No
C2orf54	4	No
CR2	4	No
MT1H	4	No
NCAN	4	No
CAPSL	4	No
SPINT2	4	No
OCIAD2	4	No
ARL14	4	No
RBP4	4	No
C7	4	No
SOCS2	4	No
NTM	4	No
HERC5	4	No
MERTK	4	No
ERICH5	4	No
GRB10	4	No
APOA2	4	No
CDH18	4	No
GAA	4	No
RRAGD	4	No
C4BPA	4	No
SLC7A11	4	No
FLOT2	4	Yes
ICAM3	4	No
NRCAM	4	No
GRPR	4	No
CRLF1	4	No
SLC45A3	4	No
MS4A2	4	No
CTSW	4	No
AGT	4	No
IER3	4	No
PSTPIP2	4	No
ZNF789	4	No
CRIPAK	4	No
HOXA7	3	No
TFPI2	3	No
DHRS13	3	No
ZNF502	3	No
CST6	3	No
CDC42EP3	3	No
SEMA5A	3	No
SERPINA6	3	No
KL	3	No
TUBB6	3	No
KAL1	3	No
FAM134B	3	No
SHC3	3	No
PXDN	3	No
PTGFRN	3	No
ANO9	3	No
CTSS	3	No
IGLV1-40	3	No
NNAT	3	No
ASPHD2	3	No
TMPRSS4	3	No
FAM13B	3	No
IDO1	3	No
GABRE	3	No
TM4SF18	3	No
FNIP2	3	No
TCN1	3	No
AGPAT9	3	No
DCLK2	3	No
COL9A2	3	No
ARHGAP36	3	No
ADAMTS2	3	No
GAD1	3	No
CRNDE	3	No
C1QBP	3	Yes
HGD	3	No
GAS1	3	No
SLC4A4	3	No
CLIC3	3	No
CXXC5	3	Yes
F2RL1	3	No
CDH10	3	No
MYBPC1	3	No
TMPRSS11E	3	No
LIN7A	3	No
ZCCHC12	3	No
E2F7	3	No
KISS1	3	No
MBOAT2	3	No
C1QL1	3	No
APLN	3	No
CAPN13	3	No
ASPHD1	3	No
HOXB13	3	No
SSTR1	3	No
PLBD1	3	No
S100P	3	No
FAM181B	3	No
CPPED1	3	No
KCNJ10	3	No
SPINK4	3	No
MEOX1	3	No
PYROXD2	3	No
F13A1	3	No
GMFG	3	No
RALGPS2	3	No
LXN	3	No
PASK	3	No
CXCL11	3	No
SPOCD1	3	No
ETNPPL	3	No
PLAU	3	No
MGP	3	No
SMARCD3	3	No
ITGB7	3	No
CREG1	3	No
OLIG2	3	No
FMO4	3	No
CXCL9	3	No
SPTLC3	3	No
C10orf82	3	No
EMB	3	No
COL27A1	3	Yes
FILIP1L	3	No
C5orf38	3	No
PHLDA2	3	No
GYPC	3	No
WNT4	3	No
MNS1	3	No
CDO1	3	No
NTS	2	No
TMTC1	2	No
SLC8A1	2	No
HES5	2	No
LCP1	2	No
STK26	2	No
UPK1B	2	No
SLPI	2	No
IGHM	2	No
C1orf61	2	No
ZNF253	2	No
ZNF626	2	No
PROCR	2	No
KRT19	2	No
NKD2	2	No
RHOD	2	No
SLC1A5	2	No
TNFAIP6	2	No
PODXL	2	No
MGST1	2	No
PAG1	2	No
PDE6G	2	No
SLC25A16	2	No
FAM150B	2	No
TFPI	2	No
CD1C	2	No
GPR173	2	No
WISP1	2	No
POPDC3	2	No
SAMD11	2	No
ANXA10	2	No
PAK3	2	No
CYR61	2	No
KLK11	2	No
CHRDL2	2	No
SERPINA1	2	No
RAB3B	2	No
NSUN7	2	No
MAST1	2	No
ADRA2A	2	No
FAM83F	2	No
FGGY	2	No
CCL28	2	No
NWD1	2	No
SCUBE2	1	No
SBSN	1	No
SDSL	1	No
GLRB	1	No
VNN1	1	No
NCAM1	1	No
OPCML	1	No
TIMP4	1	No
GALNT15	1	No
GNAI1	1	No
NRIP3	1	No
CPLX2	1	No
C6orf15	1	No
PCLO	1	No
PSCA	1	No
KRT86	1	No
THNSL2	1	No
RNF175	1	No
SNX22	1	No
A2ML1	1	No
CFI	1	No
PRKD1	1	No
KCNK6	1	No
PRR16	1	No
ZNF613	1	No
C2orf40	1	No
KRT15	1	No
TGFBR3	1	No
KANK4	1	No
NME5	1	No
GBP5	1	No
FAM69C	1	No
SPRR1A	1	No
PLGRKT	1	No
QPRT	1	No
DAGLA	1	Yes
MTCL1	1	No
EMILIN3	1	No
NXPH4	1	No
HSPA1A	1	No
HOOK2	1	No
WFDC2	1	No
CYB5R2	1	No
CKB	1	No
DIRAS2	1	No
GPR171	1	No
SPOCK2	1	No
FUT8	1	No
ENTPD3	1	No
ITLN1	1	No
IGHA1	1	No
AOC3	1	No
C1orf194	1	No
OAT	1	No
NACAD	1	No
CADM2	1	No
CYP2D6	1	No
GPR87	1	No
SCGB3A1	1	No
GPR160	1	No
EVPL	1	No
BID	1	No
S100A2	1	No
FOXA2	1	No
PNMAL1	1	No
ADM	1	No
SLAMF7	1	No
SNAP25	1	No
TMEM98	1	No

## Sheet: lapatinib
	Tissue Freq.	Identified using LASSO?
TACSTD2	13	No
KRT15	13	No
CCL20	10	No
CEACAM7	10	No
FAIM2	10	No
NAT1	10	No
CXCL9	10	No
CRISP3	10	No
LPXN	10	No
C12orf75	10	No
RRAGD	10	No
ATCAY	10	Yes
SLC1A2	10	Yes
BEX1	10	No
APLN	10	No
IRX5	10	No
AMBP	10	No
CTNND2	10	No
TIMP4	10	No
AOC1	10	No
UPK1B	10	No
KLHDC7A	10	No
TM4SF4	10	No
LRP2	10	Yes
AZGP1	10	No
OLFM4	10	No
GAL	10	No
BRINP2	10	No
SCGB2A2	10	No
WFDC2	10	No
CDHR5	10	No
DNER	10	No
HAPLN1	10	No
KCNMA1	10	No
CMTM7	10	No
F2RL2	10	No
EDARADD	10	Yes
CTHRC1	10	No
NNAT	10	Yes
AKR1C3	10	No
GLB1L2	10	No
BPIFA1	10	No
CLU	10	No
SCGB1A1	10	Yes
CPVL	10	No
ATP8B1	10	Yes
CPB1	10	Yes
S100A9	10	No
RND2	10	No
MLPH	10	No
RBP5	10	Yes
TFF2	10	No
ANXA13	10	No
PAPSS2	10	No
CYBA	10	No
SPRR1A	10	No
CCK	10	No
TENM2	10	No
SELM	10	No
ALDH3A1	10	No
SLC25A18	10	No
SCNN1A	10	No
ACTG2	10	No
GP2	10	No
CLDN1	10	No
CD38	10	No
GGT6	10	No
MUC13	10	No
KCNS3	10	No
DUSP5	10	No
PALLD	10	No
SERPINA1	10	Yes
IGFBP2	10	No
GPRC5C	10	Yes
KRT13	10	No
NTS	10	No
S100A11	10	No
CA9	10	No
DNM1	10	No
PCP4	10	Yes
SYTL2	10	No
A2ML1	9	No
MLLT11	9	No
IFI6	9	No
AKR1B10	8	No
CHGA	8	No
SCG2	8	No
THBS1	8	No
EFEMP1	8	No
SLPI	8	No
CHI3L1	7	No
SYBU	6	No
IGHV4-34	6	No
IFI27	6	No
FXYD5	6	No
PSAT1	6	No
FAM46B	6	No
MFSD2A	6	No
EPN3	6	Yes
GTSF1	6	No
CNN3	6	No
MFSD6L	6	Yes
MPP1	6	No
STEAP1B	6	No
DHRS2	6	No
GRB7	6	No
LOXL4	6	No
ELAVL4	6	No
LILRA5	6	No
GPM6A	6	No
MUC1	6	No
KDM5D	6	No
FAM20A	6	Yes
SOSTDC1	6	No
IL13RA2	6	No
PGC	6	No
TRIP6	6	No
KHDRBS3	6	No
SERPINB3	5	No
NDN	5	No
CXorf57	5	No
GALNT13	5	No
LGMN	5	No
BMP7	5	No
DMRT3	5	No
VAMP5	5	No
HSD17B3	5	No
MPDZ	5	No
IGFBP5	5	No
MSX1	5	No
JUN	5	No
ABCC5	5	No
TCEA3	5	No
LPHN2	5	No
PEG10	5	No
SHD	5	No
PMP22	5	No
ANKRD30A	5	No
CACNG7	5	No
PCSK1N	5	No
HPD	5	No
KRTDAP	5	No
MGP	5	No
WBSCR17	5	No
APOH	5	No
DPT	5	No
RARRES2	5	No
S100A4	5	No
CDO1	5	No
OTUD1	5	Yes
CD40	5	No
TWIST1	5	No
AK4	5	No
COL12A1	5	No
IQCG	5	No
KCND2	5	No
NDRG4	5	No
LRRTM3	5	No
FCRL5	5	No
UGT8	5	No
ERVMER34-1	5	No
APOD	5	No
FGF1	5	No
SLC7A3	5	No
HLA-DPA1	5	No
TUB	5	Yes
EFCAB2	5	No
KLHDC9	5	No
TCF12	5	No
UBE2E3	5	No
IFI44L	5	No
TMPRSS5	5	No
DNAJC12	5	No
PNOC	5	No
FABP4	5	No
SIX2	5	No
DHRS3	5	No
BATF	5	No
SERPINA5	5	No
NEURL1	5	No
CMBL	5	No
PSD3	5	No
SMAD1	5	No
GRIK2	5	No
HEY1	5	No
C16orf89	5	No
LUM	5	No
KRT6A	5	No
CADM2	5	No
UCHL1	5	No
ARHGAP22	5	No
WWC3	5	No
DUSP2	5	No
PTPRM	5	No
SFTPD	5	No
TRBC2	5	No
IGLV8-61	5	No
PLAU	5	No
TSC22D3	5	No
GJB2	5	No
YBX3	5	No
RNF175	5	No
CXCL8	5	No
SQRDL	5	No
FLRT3	5	No
LYPD1	5	No
HMGCS2	5	No
C2orf54	5	No
RBMS1	5	Yes
IGHM	5	No
NETO2	5	No
FBXO32	5	No
FAM155A	5	No
PTGES	5	No
MT3	5	No
CA10	5	No
HES5	5	No
GATA4	5	No
NKAIN2	5	No
TUBB2A	5	No
MT1F	5	No
SCGB3A2	5	No
CST2	5	No
SLITRK2	5	No
FAM133A	5	No
CRNDE	5	No
ZIC5	5	No
TACC1	5	No
NAV3	5	No
SV2B	5	No
TOX	5	No
PAQR8	5	No
KLK4	5	No
MYL9	5	No
GRIA1	5	No
RRAD	5	No
CTTNBP2	5	No
ITPKA	5	No
FN1	5	No
PRR15L	5	No
ARHGAP24	5	No
PSMD5	5	Yes
PTH1R	5	No
BCAN	5	No
MTCL1	5	No
LY96	5	No
CDKN2A	5	No
GRB14	5	No
NAP1L2	5	No
GDF15	5	No
LTB	5	No
CCDC160	5	No
HLA-DQA1	5	No
TGFBI	5	No
REG1A	5	No
NKX2-3	5	No
KRT6C	5	No
RORC	5	No
TMSB15A	5	No
MTSS1	5	No
STMN2	5	No
CITED1	5	No
CFH	5	No
PRSS16	5	No
MSI1	5	No
CYP4F11	5	Yes
BEX2	5	No
GGH	5	No
HIST1H1C	5	No
ANXA3	5	No
ALDH2	5	No
ANTXR2	5	No
ASPHD1	5	No
SLC16A4	5	No
EFS	5	No
GPR37	5	No
FBLN2	5	No
IL7R	5	No
MAP2	5	No
GLDC	5	No
FEZF1	4	No
SOX21	4	No
RNF182	4	No
LAPTM5	4	No
ZNF93	4	No
CRABP1	4	No
IFITM3	4	No
IRX2	4	No
EMX2	4	No
DUOX2	4	No
FGR	4	No
C7	4	No
C5orf46	4	No
LTBP2	4	No
FAM198A	4	No
PCDHB5	4	No
ANKRD1	4	No
ST6GAL2	4	No
SLC8A2	4	Yes
RAB34	4	No
GABRA3	4	No
EGLN3	4	No
MUC6	4	No
SYT9	4	No
FABP7	4	No
CPNE8	4	No
ZNF404	4	No
ITGA1	4	No
CCL21	4	No
FGFBP1	4	No
CD96	4	No
IRX3	4	No
PIK3CG	4	No
SCD5	4	No
GSC	4	No
THRSP	4	No
GOLGA8A	4	No
RORA	4	No
FAM101A	4	No
FUCA2	4	No
HOXB2	4	No
RHCG	4	No
FAM20C	4	No
THBD	4	No
GREM1	4	No
RIPPLY3	4	No
SIPA1L2	4	No
SPRR3	4	No
TF	4	No
TFF1	4	No
PLEKHS1	4	No
GRIA2	4	No
SFRP5	4	No
SLC35G2	4	No
DSC2	4	No
PTHLH	4	No
FGF2	3	No
RHBDL2	3	Yes
CYP24A1	3	Yes
QPCT	3	No
MLLT3	3	No
SPRR1B	3	No
MAPT	3	No
ANKRD35	3	No
FANK1	3	Yes
MYOF	3	No
SH3BGRL	3	No
DMD	3	No
MSX2	3	No
PPP2R2C	3	No
NPTX2	3	No
MMP9	3	No
TMEM163	3	No
CD70	3	No
FOXD2	3	No
F13A1	3	No
CLDN3	3	No
KRT19	3	No
C4orf48	2	No
TSPAN7	2	No
GATA3	2	No
CAV1	2	No
PPAPDC1A	2	No
PRSS23	2	No
POMC	2	No
BANK1	2	No
MYCN	2	No
CEL	2	No
CPXM2	2	No
PLAC1	2	No
TPSAB1	2	No
VIM	2	No
PHYHD1	2	No
EVA1C	2	No
GALM	2	No
CLIC3	2	No
HLA-E	2	No
HOXA7	2	No
MARCO	2	No
EPHB1	2	No
NPR3	2	No
AGPAT4	2	No
STAR	2	No
CMTM5	2	No
PITX2	2	No
IER3	2	No
REG3A	2	No
MDFIC	2	No
SCUBE2	2	No
PRLR	2	No
SPRR2A	2	No
RP11-433O3.1	2	No
SLC38A3	1	No
PLIN2	1	No
TBX1	1	No
STEAP1	1	No
FAM184A	1	No
SCARA3	1	No
MAP1A	1	No
NLGN3	1	No
ZNF204P	1	No
ISL1	1	No
SPAG6	1	No
ARMCX1	1	No
NTRK2	1	No
EPB41L2	1	No
PLEKHB1	1	No
RGS2	1	No
SLC30A1	1	No
DLL3	1	No
ARMCX2	1	No
MT2A	1	No
TMEM185B	1	No
CR2	1	No
DES	1	No
LTF	1	No
EXOC3L2	1	No
HLA-DRB5	1	No
CLC	1	No
KRTCAP3	1	No
CDCA7	1	No
KLK5	1	No
LMO2	1	No
IPCEF1	1	No
FGL1	1	No
CXCL10	1	No
NCAM1	1	No
HOXD13	1	No

## Sheet: bleomycin
	Tissue Freq.	Identified using LASSO?
STOM	13	No
GSTO1	13	Yes
UPK1B	13	No
ERICH5	13	No
PTGDS	13	No
AADAC	13	No
IQCA1	13	Yes
SERPIND1	13	No
FRMD5	13	No
FAM3D	13	No
RPL22L1	13	Yes
ADORA1	13	No
PTPRZ1	13	No
PIP	13	No
TNIK	13	No
RBP7	13	No
ID1	13	No
SCGB2A2	13	No
CACNG6	13	Yes
C20orf85	13	No
TMEM171	13	No
MAFB	13	Yes
LRP2	13	No
GBP2	13	No
PLXNA2	13	Yes
AGT	13	No
HS6ST2	13	No
KLK12	13	No
SALL4	13	No
SEMA3B	13	No
MAP1A	13	Yes
TFPI2	13	No
LARGE	13	No
CACNA2D3	13	Yes
KBTBD12	13	No
MYEF2	13	No
SLFN11	13	Yes
MTCL1	13	No
CD302	13	No
CRYAB	13	No
RPS4Y1	13	No
DOCK11	13	No
CLIC3	13	No
TNNI3	13	No
COL1A2	13	No
SLC28A3	13	No
XYLT1	13	No
ZC2HC1A	13	No
ITM2A	13	No
PRRX1	13	No
CAPN9	13	No
PHLDA3	13	No
PLIN2	13	No
SYNM	13	No
ARHGAP36	13	No
STEAP1	13	No
CKMT2	13	Yes
TRIM9	13	Yes
MDK	13	No
CENPV	13	No
S100P	13	No
GPR110	13	No
GSTP1	13	No
FAM69C	13	No
FBXL16	13	No
ERRFI1	13	No
DDIT4L	13	No
MUC15	13	No
SCG5	13	Yes
FERMT3	13	No
FAM133A	13	No
GDF15	13	No
KL	13	No
SERPINA1	13	No
KRT13	13	No
GLB1L2	13	No
CD9	13	No
MTHFD2	13	No
PDIA3	13	No
LYPD1	13	No
ZG16B	13	No
GPNMB	13	No
PPAP2C	13	No
ADH1C	13	No
SPINK1	13	No
ADAM23	13	No
STEAP4	13	No
GLDC	13	No
CNTN1	13	No
CRYM	13	No
SYTL2	13	No
GLMP	13	No
OPCML	13	No
TMCC2	13	Yes
KIAA1644	13	No
CYP11A1	13	No
GSTA2	13	Yes
PLEKHB1	13	No
S100A4	13	No
SLC26A3	13	No
BEX5	13	No
GAP43	13	No
COMP	13	No
BAI2	13	No
OLIG2	13	No
LRRC17	13	No
NRCAM	13	Yes
CLDN2	13	No
DES	13	No
PLA2G1B	13	No
PVRL3	13	No
LMX1B	13	No
ALDH1A2	13	No
PPP3CA	13	Yes
CYP1B1	13	No
FUT6	13	No
SULF2	13	No
C1QL1	13	No
GLIPR1	13	No
COL3A1	13	No
PTER	13	Yes
KIFAP3	13	Yes
TFAP2B	13	No
TDRP	13	No
KRT5	13	No
CREB3L3	13	No
HSPH1	13	Yes
PLAU	13	No
PRR15	13	No
VSIG2	13	No
CXCL6	13	No
CA8	13	No
DFNA5	13	No
C1orf61	13	No
KANK1	13	No
THBD	13	No
GABBR2	13	Yes
SAMD9	13	No
SLITRK6	13	No
SBSPON	13	No
FAM149A	13	Yes
AQP4	13	No
FGD6	13	No
GTSF1	13	No
ISM1	13	No
RAET1L	13	No
PXDN	13	No
C5orf49	13	No
NTNG2	13	No
CLIC6	13	No
CT83	13	No
C12orf5	13	Yes
PTGR1	13	No
MYH7	13	No
OASL	13	No
NCCRP1	13	No
SIX3	13	No
CYP27C1	13	No
VTCN1	13	No
MICU3	13	No
ADSSL1	13	No
LCK	13	No
CHI3L1	13	No
SLC14A1	13	No
ISG20	13	No
CTSB	13	No
TF	13	No
CPB1	13	No
MAGEA4	13	No
TAC1	13	No
IGF2	13	No
NGF	13	No
GPR123	13	No
WBSCR28	13	Yes
RGS16	13	Yes
ARL14	13	No
TMEM200A	13	No
SLC27A6	13	Yes
CD14	13	Yes
CTSE	13	No
SPAG6	13	No
GDPD2	13	No
FAM127A	13	No
RFX5	13	No
NID2	13	No
DERL3	13	Yes
GALNT6	13	No
LHFP	13	No
HTRA3	13	No
GAL	13	No
CALML5	13	No
TMEM156	13	No
PREX1	13	No
FAM110B	13	Yes
ELK3	13	Yes
DPP4	13	No
CXCL1	13	No
IGHV3-13	13	No
KIF1A	13	No
KCNK2	13	No
COL2A1	13	No
ZNF423	13	No
BASP1	13	No
KHDRBS3	13	No
TPX2	13	No
TRIB3	13	No
GOLT1A	13	No
FOLR1	13	No
PLS1	13	No
THRSP	13	No
CXCL9	13	No
SORL1	13	No
VEPH1	13	No
PPL	13	No
LRRC32	13	Yes
IER5L	13	No
TCEAL5	12	No
SYT4	12	No
LARP6	12	No
ARHGAP32	12	No
GFAP	12	No
SLC35G2	12	No
CAAP1	12	Yes
HIST1H4C	12	No
HAPLN1	12	No
BBOX1	12	No
PLAC8	12	No
PSD2	12	No
PVALB	12	Yes
CRLF1	12	No
PLEKHS1	12	No
HERC5	12	No
PRSS12	12	No
WIF1	12	No
IGF2BP2	12	Yes
BPIFA1	12	No
IL20RA	12	No
ACTL10	12	Yes
ERAP2	12	No
SLC1A2	12	No
ELL2	12	No
POU5F1	12	No
CDH1	12	No
TCN1	12	No
FAM20A	12	No
LRRN1	12	No
MUM1L1	12	No
GATA3	12	No
CDKN2A	12	No
TMEM246	12	No
ICAM3	12	No
IGHA1	12	No
CARD11	12	No
CYP2B6	12	No
RARRES1	12	No
STK26	12	No
SMOC1	12	No
GABRG2	12	No
RGCC	12	No
TCEA3	12	No
PDIA5	12	No
UBE2C	12	No
STC2	12	No
PI3	11	No
CHST6	11	No
IL17RB	11	No
PLEKHO1	11	No
HSPA4L	11	No
BACE2	11	No
ROR2	11	No
GRPR	11	No
SESN3	10	Yes
P2RY12	10	No
SERPINB7	10	No
KISS1	10	No
TUBA4A	10	No
KCNJ16	10	No
IER3	10	No
PRSS21	10	No
AK3	10	Yes
VSTM2L	10	No
CSTA	10	No
ALDH3B2	10	No
WT1	10	No
ACTA2	9	No
PROSER2	9	Yes
GPM6A	9	No
BIRC3	9	No
CDHR2	9	No
ERP27	9	No
TMEM130	4	No
UBE2L6	4	No
FOSL1	4	No
TNFRSF18	4	No
DNAJC12	4	No
CXCR4	4	No
SPRR1A	4	No
COCH	4	No
SRM	4	No
SNCA	4	No
CSRP2	4	No
ADM2	4	No
DPY19L2	4	No
PCDHB4	4	No
EXTL1	4	No
FAM131C	4	No
MICAL2	3	No
LMO7	3	No
JUN	3	No
PPAPDC1A	3	No
FHOD3	3	No
BFSP1	3	No
PFKM	3	No
TM4SF4	3	No
GALNT13	3	No
C3orf14	3	No
LY6G6C	3	No
KLHL14	3	No
HIST1H2BK	3	No
GRIA4	3	No
TNFAIP6	3	No
EPHA3	3	No
MCEMP1	3	No
SDPR	3	No
RASEF	3	No
HSD17B8	3	No
AGR3	3	No
NPM3	3	Yes
ERMP1	3	No
GABRB3	3	No
SLC6A1	3	No
LAMA4	3	No
TBX21	3	No
RASAL1	3	No
EGFLAM	3	No
FAM83F	3	No
CXCL13	3	No
ADCYAP1R1	3	No
GP2	3	No
ANXA4	3	No
SHISA2	3	No
TANC2	3	No
SH3BGRL	3	No
C5orf30	3	Yes
MORN5	3	No
OVGP1	3	No
SLC16A8	3	No
THBS2	3	No
KYNU	3	No
FMOD	3	No
DCBLD2	3	No
HIST1H2AI	3	No
HPGD	3	No
CCL28	3	No
PKIB	3	No
ATP11A	3	No
MYC	3	No
MAMLD1	3	No
DUSP5	3	No
SPON2	3	No
CLDN8	3	No
CAMP	3	No
OLFML1	3	No
HRK	3	No
ADAMDEC1	3	No
VGF	3	No
GPR116	3	No
ZNF467	3	No
GREM1	3	No
PSIP1	3	No
GOLGA8A	3	No
CAPN8	3	No
MKRN3	3	No
PF4	3	No
VEGFC	3	No
TTC39A	3	No
SPINK2	3	No
CUX2	3	No
CADPS2	3	No
FLOT1	3	No
SPINT2	3	No
SP8	3	No
S1PR3	3	No
C6orf52	3	No
DKK4	3	No
PITPNM3	3	No
BNC1	3	No
PTPRH	3	No
AKR1C2	3	No
ARHGDIG	3	No
CCL13	3	No
FAM162B	3	No
GNAO1	3	Yes
FABP4	3	No
ABCA12	3	No
PYCARD	3	No
RRM2	3	No
DUSP26	3	No
ST6GALNAC2	3	No
WLS	3	No
VSIG1	3	No
LTB	3	No
FOXG1	3	No
HES5	3	No
SPINK5	3	No
ZNF486	3	No
COL6A3	3	No
KRTDAP	3	No
MREG	3	No
MYEOV	2	No
NEFH	2	No
TIMP1	2	No
OBP2B	2	No
IGHM	2	No
RP11-400K9.4	2	No
GPX7	2	No
PCLO	2	No
HMGN5	2	No
LPL	2	No
DIRAS3	2	No
CLEC2L	2	No
CXXC5	2	No
CA4	2	No
GPR87	2	No
CHODL	2	No
D4S234E	2	No
ANO9	2	No
BCL11B	2	No
SSTR1	2	No
RARRES2	2	No
C1orf95	2	No
BAMBI	2	No
CCDC184	2	No
RAB27B	2	No
S100A9	2	No
MROH6	2	No
SEMA5A	2	No
CCDC8	2	No
CCL2	2	No
ULK2	2	No
PRCP	2	No
EPHA1	2	No
ARL9	2	No
STAMBPL1	2	No
SOX21	2	No
TCEAL8	2	No
COL14A1	2	No
GYLTL1B	2	No
SPRR2A	2	No
FUT2	2	No
UCA1	2	No
AMPH	2	Yes
TFF2	2	No
EHF	2	No
DGKB	2	No
HBQ1	2	No
PDPN	2	No
NMB	2	No
PQLC3	2	No
CAMK2N2	2	No
NXPH1	2	No
HOXD8	2	No
CPE	2	No
AKAP6	2	No
ROBO1	2	No
TTYH2	2	No
SLC22A3	2	No
CLDN16	2	No
TFF3	2	No
HHEX	2	No
HIST1H2BC	2	No
NTN1	2	No
CLU	2	No
KCNQ2	2	No
BCHE	2	No
GULP1	2	No
COL28A1	2	No
SECISBP2	2	No
GBP4	2	Yes
CDH4	2	No
DBP	2	No
PRSS3	2	No
BRINP2	2	No
ALDH1L2	2	No
ATRNL1	2	No
SOWAHC	2	No
PID1	2	No
IL18R1	2	No
ARMCX3	2	No
NME3	2	No
IGFL1	2	No
TSPAN1	2	No
KNDC1	2	No
PCSK5	2	No
HIST1H2AG	2	No
IGJ	1	No
NEURL1B	1	No
PCDH17	1	No
MAGEA1	1	No
TMEM200B	1	No
QSOX1	1	No
SULT1E1	1	No
PCDHB10	1	No
GPR158	1	No
FUCA2	1	No
PPARG	1	No
GPR133	1	No
COL11A2	1	No
PTK7	1	No
NAV3	1	No
RASSF4	1	No
ANKRD37	1	No
AKAP3	1	No
PDK1	1	Yes
C11orf70	1	No
TM4SF20	1	No
FAM208B	1	No
SHC2	1	No
STRBP	1	No
RP11-433O3.1	1	No
RAB11FIP1	1	No
PRKAR2B	1	No
PRSS1	1	No
MXRA7	1	No
TRPM8	1	No
PTPRU	1	No
ROBO2	1	No
PRRT4	1	No
CDO1	1	No
BRINP3	1	No
SHC3	1	No
C1orf189	1	No
PITX1	1	No
ALDH1A1	1	No
MFSD6	1	No
TMEM198	1	Yes
LEPR	1	No
FAAH2	1	No
TFF1	1	No
WNT7A	1	No
F12	1	No
AQP5	1	No
FGB	1	No
HCAR1	1	No
F3	1	No
SIX1	1	No
PNP	1	No
SLC12A8	1	No
NAT2	1	No
PPAP2B	1	No
FAXC	1	No
EMB	1	No
TP53I3	1	No
SLIT2	1	No
ABAT	1	No
MYH11	1	No
PTBP3	1	No
NOG	1	No
HOXD1	1	No
PDLIM4	1	No
PPAP2A	1	No
PCYT1B	1	No
HLA-DRB5	1	No
C4BPA	1	No
GABRE	1	No
MAP1B	1	No
TNNT1	1	No
MGMT	1	No
TONSL	1	No
FAM155B	1	No
IGSF6	1	No
SEPT3	1	No
PTP4A3	1	No
C4BPB	1	No
ASPA	1	No
TNFSF13B	1	No
LIPM	1	No
TNR	1	No
AEBP1	1	No
MLXIPL	1	No
PTGS2	1	No
LRG1	1	No
TRDC	1	No
IL13RA2	1	No
FAM69A	1	No
KCNJ15	1	No
SKAP2	1	No
REPS2	1	No
CYTL1	1	No
C1QC	1	No
EMID1	1	No
PRTFDC1	1	No
ENHO	1	No
TMEM252	1	No
PAEP	1	No
CXCR6	1	No
ADCY7	1	No
RGS7	1	No
CCDC160	1	No
SLPI	1	No
SMC4	1	No
SCGB2A1	1	No
ADHFE1	1	No
TDRD7	1	No
TRBV9	1	No
DEGS2	1	No
CALML3	1	No
ZCCHC24	1	No
RAB3C	1	No
FLRT3	1	No
SERPINB5	1	No
CTTNBP2	1	No
C12orf56	1	No
HRCT1	1	No
UTY	1	No
MEOX1	1	No
ZFP82	1	No
SELM	1	No
IL17D	1	No
SLC38A3	1	No
CD68	1	No
FILIP1L	1	No
CNN3	1	No
SAMD5	1	No
ACOX2	1	No
FAM155A	1	No
GPX3	1	No
BCL2L10	1	No
IFITM10	1	No
ECHDC1	1	No
SDCBP2	1	No
ENTPD3	1	No
WNT4	1	No
MUC1	1	No
TSC22D3	1	No
EVA1A	1	No
PTGER1	1	No
UGT2B7	1	No
PHKA1	1	No
RASGEF1A	1	No
KIAA1324L	1	No
ROS1	1	No
CHST4	1	No
COLEC11	1	No
EVI2A	1	No
AMPD3	1	No
GPR19	1	No
GPR157	1	No
INPP1	1	No
SFRP2	1	No
WNT2	1	No
TTC32	1	No
ETNPPL	1	No
SLC35E3	1	No
BMP2	1	No
CLDN18	1	No
IRX2	1	No
ECHDC3	1	No
KCNE3	1	No
RP11-401P9.4	1	No
ESR1	1	No
FRRS1	1	No
SPAG4	1	No
GALNT14	1	No
PNOC	1	No
IGLV1-40	1	No
FKBP1A	1	No
MPP2	1	No
IGF2BP1	1	No
EVA1B	1	No
LRRC3B	1	No
SULT1B1	1	No
BRI3	1	Yes
ASPHD1	1	No
SEZ6L	1	No
TPM2	1	No
EPHA4	1	No
GALNT9	1	No
PLA2G4A	1	No
LINC00839	1	No
ANXA3	1	No
PAPSS2	1	No
YOD1	1	No
LRRC46	1	No
C11orf80	1	No
DHRS2	1	No
KLRB1	1	No
GPR115	1	No
SLC25A48	1	No
RAB41	1	No
IGHV4-34	1	No
CPPED1	1	No
FAS	1	No
FAM43B	1	No
COL4A2	1	No
CYSRT1	1	No
HLA-DRA	1	No
ZNF763	1	No
TRIB2	1	No
KLK8	1	No
RP11-44F21.5	1	No
P2RX6	1	No
RFTN2	1	No
BANK1	1	No
RBM24	1	No
TSACC	1	No
SLC7A5	1	No
ZNF667-AS1	1	No
SPP1	1	No
MMP1	1	No
NRG3	1	No
LMO3	1	No
HGD	1	No
SORCS1	1	No
CRTAC1	1	No
FUCA1	1	No
PNMA2	1	No
SAMD13	1	No
SOD3	1	No
EDIL3	1	No
BRINP1	1	No
SCNN1A	1	No
KIAA1549L	1	No
ZBED2	1	No
SERPINB1	1	No
CCL19	1	No
TNFSF9	1	No
P2RX7	1	No
IGFBP3	1	No
GALNT16	1	No
SPTSSB	1	No
MYBL1	1	No
SNX20	1	No
ENPP2	1	No
PGM5	1	No
NUP62CL	1	No
PIGT	1	No
BHLHE40	1	No
CYP2C8	1	No
AK4	1	No
CTNND2	1	No
PLVAP	1	No
PLCXD3	1	No
PTCH2	1	No
KIAA2022	1	No
CSRNP3	1	No
GPX1	1	No
CAMK2N1	1	No
RUNDC3A	1	No
NQO2	1	No
KCP	1	No
TMEM190	1	No
MMRN1	1	No
RGAG4	1	No
GPAM	1	No
RFFL	1	No
RENBP	1	No
FOXF1	1	No
TOX	1	No
CD8B	1	No
ETHE1	1	No
CD1E	1	No
ASS1	1	No
SERPINB6	1	No
TMIE	1	No
MFSD12	1	No
ARC	1	No
EFNA5	1	No
LUM	1	No
CD2BP2	1	No
SH3GL2	1	No
EPN3	1	No
OLFM1	1	No
HPCA	1	No
TSPAN11	1	No
MUC2	1	No
GJA1	1	No
ADRA1B	1	No
GABRA3	1	No
REG1A	1	No
TRIM17	1	No
IL33	1	No
SIX2	1	No
LTBP1	1	No
CEACAM6	1	No
FAT1	1	No
MYOM2	1	No
MMP13	1	No
MOXD1	1	No
EPHA7	1	No
PHKA2	1	No
ZNRF2	1	No
GZMM	1	No
NAP1L2	1	No
BMP4	1	No
ZNF823	1	No
TNFAIP3	1	No
TBX1	1	No
CPXM2	1	No
KCNAB1	1	No
GPRC5A	1	No
ATP1B2	1	No
LCP1	1	No
CTSK	1	No
PLLP	1	No
CLCN4	1	No
S100A2	1	No
BPIFB1	1	No
KCNK15	1	No
NAT1	1	No
MAGED1	1	No
CYB5A	1	No
LGALS2	1	No
LEF1	1	No
CACNA1A	1	No
TTYH1	1	No
SUCNR1	1	No
DQX1	1	No
ABCC4	1	No
EMP1	1	No
TGFBI	1	No
CRACR2B	1	No
RSAD2	1	No
IL24	1	No
LY6D	1	No
SOX8	1	No
NFIA	1	No
TENM4	1	No
OTUD1	1	No
EIF5AL1	1	No
LY96	1	No
UPK3A	1	No
SLC7A11	1	No
PTPN14	1	Yes
SNCB	1	No
LRP12	1	No
SORCS2	1	No
ZNF683	1	No
DOCK3	1	No
MMP9	1	No
PPM1J	1	No
BAIAP3	1	No
SEPT5	1	No
DNAH2	1	No
TIAM2	1	No
HLA-C	1	No
FGFBP2	1	No
NELL2	1	No
IGF1	1	No
MT1F	1	No
MPDZ	1	No
CCL8	1	No
CCT6B	1	No
EPS8L1	1	No
GNA14	1	No
AZGP1	1	No
PAQR6	1	No
TGM1	1	No
PLA2G5	1	No
GHR	1	No
KCNN4	1	No
C6	1	No
STS	1	No
COL11A1	1	No
MMP10	1	No
TMPRSS5	1	No
SUSD2	1	No
DNAH5	1	No
APOD	1	No
MSC	1	No
DNASE2B	1	No
TNFSF11	1	No
CCT6A	1	No
CAPN13	1	No
GATM	1	No
REC8	1	No
CA9	1	No
PPP1R14A	1	No
PIEZO2	1	No
KCNJ10	1	No
CD55	1	No
UBE2E3	1	No
SCEL	1	No
TFAP2C	1	No
MGST2	1	No
ALCAM	1	No
ADCY8	1	No
OAF	1	No
GGT5	1	No
TNFRSF11B	1	No
SLC27A2	1	No
DIO1	1	No
CDCA7L	1	No
ASMTL	1	No
C2orf70	1	No
AKR1B10	1	No
RCAN1	1	No
CDKN2C	1	No
ITGB6	1	No
EEF1A2	1	No
HIST3H2BB	1	No
TREM2	1	No
SFRP5	1	No
LIPT2	1	No
SFTPB	1	No
ASRGL1	1	No
MUCL1	1	No
CACNG4	1	Yes
KDR	1	No
HTRA1	1	No
FZD8	1	No
FAM171A1	1	No
MAP3K5	1	No
SOCS2	1	No
NUPR1	1	No
GLCE	1	No
CYP4F11	1	No
DYNLRB2	1	No
MYO10	1	No
SDC2	1	No
SESN1	1	No
FAM126A	1	No
NAPSA	1	No
IGLV3-10	1	No
TMEM59L	1	No
CLC	1	No

## Sheet: paclitaxel
	Tissue Freq.	Identified using LASSO?
COL1A2	13	No
BST2	13	No
TNFSF10	13	No
COL6A3	13	No
CD38	13	No
KHDRBS3	13	No
ABCB1	13	Yes
TACSTD2	13	No
TBX3	13	Yes
PLBD1	13	No
MT3	13	No
CCK	13	No
ECHDC3	13	No
CLDN1	11	No
PYGL	11	No
SPX	11	No
SPAG4	11	No
ACER2	11	No
SLURP1	11	No
NRN1	11	No
CDC42BPG	11	No
CMTM7	11	No
LAMP5	11	No
DES	11	No
PRRX2	11	No
CCNI2	11	No
CLDN18	11	No
RAB39B	11	No
SLC17A4	11	No
AOC1	11	No
NQO1	11	No
GPR160	11	No
G0S2	11	No
BARX1	11	No
JARID2	11	Yes
CSTA	11	No
COLGALT2	11	No
CHI3L1	11	No
SFRP2	11	No
LINC00847	11	No
CLEC2B	11	No
PNMA3	11	No
SLC6A1	11	No
SIX1	11	No
ASTN2	11	Yes
DPP4	11	No
ADAM12	11	No
RAC3	11	No
CECR6	11	No
TUBB6	11	No
SPRR1A	11	No
DLL3	11	No
CFL2	11	No
B4GALNT3	11	No
TFPI2	11	No
ENKUR	11	No
SLC16A4	11	No
AGT	11	No
TMEM132B	11	Yes
CITED1	11	No
PSD2	11	No
AK5	11	No
MPZ	11	No
DFNA5	11	No
SNCA	11	No
PSAT1	11	No
TCEA3	11	No
OPN3	11	No
SAMD5	11	No
HTRA3	11	No
SH3BGR	11	No
NANOS3	11	No
OLIG2	11	No
PLN	11	No
GRP	11	No
ANTXR2	11	No
GTSF1	11	No
MT1F	11	No
MYH7	11	No
MMP7	11	No
EIF1AY	11	No
CAB39L	11	No
CAPSL	11	No
IRX3	11	No
ALOX5AP	11	No
SPRR3	11	No
GBP5	11	No
UGT8	11	No
THBS4	11	No
SCARA5	11	No
SLC22A3	11	No
LDLR	11	No
CALML3	11	No
IL13RA2	11	No
DSG2	11	No
VSTM2L	11	No
UCA1	11	No
PLEKHG1	11	No
CA9	11	No
IGHM	11	No
OLFM1	11	No
CLDN2	11	No
MME	11	No
C15orf48	11	No
CD2	11	No
DOK5	11	No
PRR18	11	No
TIMP3	11	No
AQP9	11	No
LILRB4	11	No
PRRT4	11	Yes
TTR	11	No
MNDA	11	No
TRPM4	11	No
BCAN	11	No
GALNT13	11	No
FAM133A	11	No
ALDH1A1	11	No
S100A9	11	No
SLITRK2	11	No
CFI	11	No
ST6GALNAC1	11	No
BRINP2	11	No
METTL7B	11	No
NGFRAP1	11	No
SAMD13	11	No
IER3	11	No
RTP4	11	No
ST6GALNAC5	11	No
ID1	11	No
SCGB2A2	11	No
SMAD1	11	No
FAM83E	11	No
GPM6A	11	No
GALNT7	11	No
MUC13	11	No
POMC	11	No
AQP1	11	No
SPINK2	11	No
POPDC3	11	No
VAV3	11	No
SMOC1	11	No
MSLN	11	No
CD68	11	No
RAB20	11	No
FGG	11	No
C6orf141	11	No
MIR205HG	10	No
TMEM45A	10	No
APOH	10	No
SFTPA2	10	No
FBN3	9	No
MCHR1	8	No
TMEM56	8	No
QPCT	8	No
IGHA1	8	No
BTBD17	8	No
IQCG	8	No
LGALS1	8	No
CSRNP3	8	No
CDO1	8	No
ALCAM	8	No
NLRP2	8	No
TUBB2B	8	No
CAMKV	8	No
TIAM2	8	No
GHR	8	No
SPINT2	8	No
SERPINA5	8	No
CDA	8	No
ID4	8	No
PEG10	8	No
SALL4	8	No
MAP7D2	8	Yes
RNF130	8	No
APLN	8	No
APOC1	7	No
WNT6	7	No
LY6G6C	7	No
GSTA2	7	No
SCN4B	7	No
HPCA	7	No
GNA15	7	No
CEACAM7	7	No
CRNDE	7	No
PENK	7	No
P3H2	7	No
SOBP	7	No
STOM	7	No
ORM2	7	No
LMO1	7	No
TSPAN8	7	No
SDC4	7	No
S100P	7	No
MT1G	7	No
HOMER1	7	No
NLGN4X	7	No
SCNN1A	7	No
SLC16A11	7	No
REG4	7	No
ST3GAL6	7	No
CCDC162P	7	No
ITM2A	7	No
C1orf61	7	No
NCAM2	7	No
DNAAF3	7	No
NMB	7	No
IGFBP6	7	No
FCRL5	7	No
KCNMA1	7	No
MNX1	7	No
HEPACAM	7	No
C3	7	No
GGH	7	No
FABP4	7	No
DNASE2B	7	No
CD200	7	No
PRELP	7	No
EPHA4	7	No
AKR1C2	7	No
ARHGAP36	7	No
ZNF560	7	No
EPSTI1	7	No
NEFH	7	No
POSTN	7	No
SLC35F1	7	No
PCDH9	7	No
AKR1C1	7	No
DNAJC12	7	No
APOL3	7	No
LPHN3	7	No
ID2	7	No
SPOCK1	6	No
RORA	6	No
AGR2	6	No
RAB34	6	No
IGHA2	6	No
NKX2-3	6	No
GCA	6	No
COL4A6	6	No
SYCP2	6	No
SPNS3	6	No
CHST8	6	No
CCL21	6	No
SRMS	6	No
ADCY3	6	No
PCLO	6	No
STAT4	6	No
LCP1	6	No
CCNO	6	No
ADCY4	6	No
SLITRK6	6	No
C12orf75	6	No
PTAFR	6	No
C1orf115	6	No
UST	6	No
RASSF6	6	No
SELL	6	No
CSRP2	6	No
MAPK8IP1	5	No
SCGB3A2	5	No
LPL	5	No
BHLHE22	5	No
EDIL3	5	No
METRNL	5	No
ATP1B2	5	No
CYB5A	5	No
TM4SF1	5	No
LYPD1	5	No
ZNF682	5	No
RAB41	5	No
SMPD3	5	No
NYAP1	5	No
KCNN3	5	No
STAC2	5	No
SFN	5	No
CDK5R2	5	No
SLC27A2	5	No
CFD	5	No
KRT19	5	No
HLA-C	5	No
MFAP2	5	No
C6orf223	5	No
SUSD1	5	No
PRSS1	5	No
TMEM47	5	No
VSIG4	5	No
RHCE	5	No
IFNG	5	No
POU5F1	5	No
CP	5	No
CARTPT	5	No
BANK1	5	No
GOLGA8A	5	No
TRBC2	5	No
TRPA1	5	No
LGI4	5	No
DUSP9	5	No
HLA-DRA	5	No
IGLL5	5	No
IGLV1-40	5	No
SP8	4	No
FAM57B	4	No
C19orf38	4	No
FAM198A	4	No
SLC30A2	4	No
REG1A	4	No
MAP2	4	No
GALNT9	4	No
PMEPA1	4	No
SPON2	4	No
SLN	4	No
DIRAS3	4	No
BAMBI	4	No
TRO	4	No
C7orf50	4	No
MICAL1	4	No
STC2	4	No
HSD17B2	4	No
CT83	4	No
PLCG2	4	No
IGLV8-61	4	No
BCAS1	4	No
ENPP3	4	No
ARHGEF19	4	No
PSTPIP2	4	No
RP11-44F21.5	4	No
RND2	4	No
CACNA1B	4	No
CDHR1	4	No
SNX7	4	No
SULT1B1	4	No
MAMLD1	4	No
FOXF2	4	No
TIMP1	4	No
PLA2G3	4	No
FAM46A	4	No
DEFB1	4	No
KIAA1549L	4	No
HIST1H1D	4	No
APOBEC3G	4	No
SULT1E1	4	No
BCL7A	3	No
GPR123	3	No
TMEM92	3	No
PTGER2	3	No
CLDN3	3	No
FAM46B	3	No
ACY3	3	No
QPRT	3	No
P2RY13	3	No
GLDC	3	No
THRSP	3	No
NETO2	3	No
CAV1	3	No
C10orf99	3	No
P4HA2	3	No
DNAJC6	3	No
TLR8	3	No
KRT7	3	No
SERPING1	3	No
PCDHB2	3	No
BEX2	3	No
SYTL2	3	No
DOCK10	3	No
SGIP1	3	No
PRDM8	3	No
RCOR2	3	No
RASSF4	3	No
FGA	3	No
LAMA4	3	No
CXCL10	3	No
CTD-2228K2.7	3	No
TDRD9	3	No
AOC3	3	No
DDN	3	No
TMC4	3	No
C1orf228	3	No
MYT1	3	No
TNFAIP6	3	No
CUX2	3	No
GLI2	3	No
IGF2BP3	3	No
KLRF1	3	No
FN1	3	No
UGT2B15	3	No
SCNN1G	3	No
ABCA1	3	No
ERG	3	No
SYNM	3	No
MEIS2	3	No
NRGN	3	No
TFR2	3	No
KIF5A	3	No
BMP2	3	No
GSTP1	3	No
CXCL13	3	No
CTLA4	3	No
KLRAP1	3	No
FHL1	3	No
REG3A	3	No
GCHFR	3	No
EMC10	3	No
ZNF701	3	No
FCGR2B	3	No
STMN2	3	No
C10orf107	3	No
ARHGAP28	3	No
PTN	3	No
DPT	3	No
SLC5A1	3	No
SC5D	3	No
NOVA1	3	No
LIN7A	3	No
LIX1	3	No
EPB41L2	3	No
MAGEA1	3	No
ETS2	3	No
NKAIN2	3	No
COL22A1	3	No
PAIP1	3	No
ANK3	3	No
IPCEF1	3	No
RARRES3	3	No
NDNF	2	No
CDX1	2	No
PAMR1	2	No
MKRN3	2	No
SCG2	2	No
RPS4Y1	2	No
HDAC1	2	No
RORB	2	No
GLI3	2	No
BTNL9	2	No
DUSP6	2	No
TNFRSF10A	2	No
DNER	2	No
B3GALNT1	2	No
ACSL5	2	No
TFAP2B	2	No
FAM49A	2	No
ABO	2	No
EEF1A2	2	No
RAMP1	1	No
SLC30A4	1	No
PAK3	1	No
NECAB2	1	No
NKG7	1	No
LRRN3	1	No
ACP6	1	No
SCUBE2	1	No
FOXF1	1	No
NEU4	1	No
BCL2A1	1	No
CELF3	1	No
PRDX1	1	No
PADI2	1	No
ZDHHC2	1	No
CYSTM1	1	No
SLC16A2	1	No
LGALS2	1	No
AGMO	1	No
SH3GL2	1	No
HOXD9	1	No

## Sheet: imatinib
	Tissue Freq.	Identified using LASSO?
SCGB3A1	13	Yes
ST8SIA6	13	Yes
FAM127A	13	No
CISH	13	Yes
MYOF	13	No
IGF2BP3	13	No
CST7	13	Yes
AEBP1	13	Yes
TSPAN8	13	No
S100A10	13	No
NGFRAP1	13	No
AKR1C1	13	No
XIST	13	No
HTRA3	13	Yes
NRN1	13	No
DKK1	13	No
FAM46A	11	No
IGHV1-69	11	No
POU2AF1	11	No
NANOS3	11	No
RAB38	11	No
CRABP1	11	Yes
FAIM2	11	No
BMP7	11	No
DNAJC15	11	Yes
LGR6	11	No
CPB1	11	No
ACKR1	11	No
ID3	11	No
SUCNR1	11	No
PHACTR3	11	No
SPON2	11	No
SQRDL	11	No
ENKUR	11	No
OSCAR	11	Yes
TMEM100	11	No
NQO2	11	No
EFR3B	11	No
FUCA1	11	No
LILRA5	11	Yes
CCDC74A	11	No
OMD	11	Yes
RNASE2	11	No
GREM1	11	No
NCAN	11	No
BMPR1B	11	No
NMU	11	No
PPP1R9A	11	Yes
SCG5	11	No
MGST3	11	Yes
SOX8	11	No
NAT8L	11	No
RGS16	11	No
S100P	11	No
FABP7	11	No
SMPD3	11	No
ICAM3	11	No
UBE2C	11	No
TRDC	11	No
CNTN1	11	No
COL6A3	11	No
IFI6	11	No
COL15A1	11	No
TLX1	11	Yes
DFNA5	11	No
BST2	11	No
TPBG	11	No
RAB3C	11	No
MAPK8IP1	11	No
IGLV1-40	11	No
DENND2D	11	No
REC8	11	No
S100A4	11	No
COL11A1	11	No
SELP	11	No
RNASE6	11	Yes
NDNF	11	No
SHOX2	10	Yes
CLGN	10	No
CHI3L1	10	No
IL1R2	10	No
CD3D	10	No
LXN	9	No
DMBT1	9	No
EFHC2	9	Yes
CFH	9	No
PALLD	9	No
CLC	9	Yes
SHISA2	9	No
BRINP2	8	No
LPHN3	8	No
C19orf33	8	No
SERPINB1	8	No
LCN2	8	No
IGLL5	6	No
KRT6A	6	No
SCNN1B	5	No
VSTM2B	5	No
CAMK2N2	5	No
DCXR	5	No
NLGN3	5	No
CSTA	5	No
HYI	5	No
FGG	5	No
NDRG1	5	No
DDX60	4	No
NR2F1	4	No
EIF1AY	4	No
PHGDH	4	No
ACTL8	4	No
CD52	4	No
DDN	4	No
TCF4	4	No
F3	4	No
RASD1	4	No
GRP	4	No
CMTM5	4	No
GPR65	4	No
GGTA1P	4	No
RAB3D	4	Yes
KLK3	4	No
SERPINA11	4	No
QPRT	4	No
FREM1	4	No
CFTR	4	No
TES	4	No
MGAT4C	3	No
ZNF418	3	No
TAGLN3	3	No
CD44	3	No
IGLV8-61	3	No
CD69	3	No
STEAP2	3	No
TDRD9	3	No
PRR18	3	No
TPD52	3	No
HMGN2P46	3	No
PDE6B	3	No
CHADL	3	No
TFF1	3	No
ICAM5	3	No
ZNF469	3	No
FZD2	3	No
ADRA1B	3	No
GPR171	3	No
MAPK15	3	No
CLDN5	3	No
NTS	3	No
DSG2	3	No
CXCL8	3	No
PTPRH	3	No
TCF15	3	No
RARRES2	3	No
SAMSN1	3	No
SLC30A1	3	No
KCNN2	3	No
PRSS23	3	No
TBC1D8	3	No
LIPH	3	No
SLC35G2	3	No
SLCO1A2	3	No
COL8A1	3	No
KCTD12	3	No
STEAP1B	3	No
GCNT3	3	No
DPP6	3	No
PIK3C2B	3	No
DUSP23	3	No
PLAC8	3	No
BMP2	3	No
KCNN3	3	No
NNAT	3	No
PAPSS2	3	No
GTSF1	3	No
PCED1A	3	No
TGIF1	3	No
GALNT9	3	No
DOCK5	3	No
P2RX7	3	No
CPXM2	3	No
CTSH	3	No
AMBP	3	No
GSDMC	3	No
MICB	3	No
STAP1	3	No
GRB14	3	No
HLA-DQA1	3	No
CHST8	3	No
DENND3	3	No
IRX1	3	No
IGF2BP1	3	No
RASSF6	3	No
SCNN1G	3	No
EMX2	3	No
TUB	3	No
NTNG2	3	No
TUBB2B	3	No
TMEM176A	3	No
SLITRK6	3	No
ISLR	3	No
CDO1	3	No
GNAI1	3	No
PCDHB5	3	No
NDUFA4L2	3	No
TMEM92	3	No
DHCR7	3	No
BCAN	3	No
CD40	3	No
IGLV3-10	3	No
INHBB	3	No
PRKY	3	No
PTPRN2	3	No
SMOC1	3	No
MAGEA1	3	No
DUSP15	3	No
BIN1	3	No
FAM26F	3	No
MLF1	3	No
CEACAM5	3	No
C8orf4	3	No
FCN1	3	No
CCL21	3	No
NQO1	3	No
MCOLN3	3	No
PRSS16	3	No
CYP2W1	3	No
CACNA1A	3	No
MGLL	3	No
SEMA3C	3	No
RETN	3	No
DUSP8	3	No
CXCL9	3	No
HRASLS5	3	No
KMO	3	No
CTSL	3	No
CLIP3	3	No
SMIM10	3	No
SLC28A3	3	No
CYP2S1	3	No
MTL5	3	No
C4orf48	3	No
FZD8	3	No
PBX4	3	No
RSRC1	3	Yes
SH3RF2	3	No
IGJ	3	No
CD163L1	3	No
MNX1	3	No
LUM	3	No
GSTA1	3	No
EMB	3	No
GRIK3	3	No
STXBP6	3	No
SPOCK1	3	No
GLRB	3	No
NEFH	3	No
RERG	3	No
SLC35E3	3	No
ARC	3	No
GPRC5A	3	No
MAFG	3	Yes
PRKCA	3	No
GPX2	3	No
IGHV4-34	3	No
DNM3	3	No
CD9	3	No
KLHL6	3	No
DEPTOR	3	No
TMEM130	3	No
MSRB3	3	No
SH3BGRL	3	No
DERL3	3	No
MLLT11	3	No
RGCC	3	No
SLC4A4	3	No
FAM129A	3	No
GZMK	3	No
DUSP1	3	No
LRRC2	3	No
ZNF43	3	Yes
CCNA1	3	No
TNNI3	3	No
PID1	3	No
DOK4	3	No
LY6H	3	No
SPATC1L	3	No
KCNN4	3	No
HLA-DRB5	3	No
TGFBI	3	No
RAB34	3	No
MFSD6L	3	No
MANEAL	3	No
MGAT5B	3	No
GKAP1	3	No
ADORA2B	3	No
VPREB3	3	No
IL2RA	3	No
CYTL1	3	No
RASD2	3	No
TMEM98	3	No
IGHM	3	No
TNNT1	3	No
CCL24	3	No
PADI2	3	No
TRIO	3	Yes
IQGAP2	3	No
ABCC4	3	No
SYN1	3	No
EFHD1	3	No
GNG3	3	No
FDCSP	3	No
NEFM	3	No
IGSF21	3	No
SFTPB	3	No
OTUD1	3	No
P2RY1	2	No
ZNF711	2	No
HSH2D	2	No
GNG11	2	No
LGALS3	2	No
GMFG	2	No
CTXN1	2	No
MET	2	No
NLGN4X	2	No
CNN3	2	No
SOBP	2	No
CTSE	2	No
FEV	2	No
ST6GALNAC5	2	No
GSTP1	2	No
C2orf54	2	No
GALNT5	2	No
CMTM7	2	No
ANKRD45	2	No
S100B	2	No
ZNF441	2	No
BTBD11	2	No
GNAQ	2	No
PRSS21	2	No
FCGR2B	2	No
SDCBP	2	No
FAM43A	2	No
TREM1	2	No
CSF1R	2	No
DMRT2	2	No
NPY1R	2	No
NOVA1	2	No
CAV2	2	No
MEGF10	2	No
CLDN16	2	No
MINPP1	2	No
NDN	1	No
EYA1	1	No
GNG4	1	No
HGD	1	No
NEURL1	1	No
HMP19	1	No
TEC	1	No
C1orf64	1	No
ALDH3B2	1	No
SLC40A1	1	No
ATL3	1	No
PRTFDC1	1	No
GRIK5	1	No
SRGN	1	No
KLHDC7B	1	No
ELOVL4	1	No
MYEOV	1	No
CECR6	1	No
SCGN	1	No
GJA1	1	No
DUSP26	1	No
ATP13A4	1	No
EPHX3	1	No
GPR18	1	No
WASF3	1	No
IGSF9B	1	No
KCNK1	1	No
PPP2R2C	1	No
TMCO4	1	No
THY1	1	No
GAL3ST3	1	No
AIM1	1	No
AHCYL2	1	No
FBP1	1	No
RPS4Y1	1	No
PTGER2	1	No
SELL	1	No
SH3BGR	1	No
BAIAP2L1	1	No
TCEA3	1	No
HIST1H2AC	1	No
PNOC	1	No
DNAJC12	1	No
COL3A1	1	No
TG	1	No
FEZ1	1	No

## Sheet: cisplatin
	Tissue Freq.	Identified using LASSO?
MAOA	13	No
SLC1A2	13	No
TSPYL5	13	No
GOLT1A	13	Yes
IGF2BP1	13	Yes
SST	13	No
RGS2	13	No
IL17D	13	No
TNFRSF11B	13	No
LRRN1	13	No
RCOR2	13	No
MMP7	13	No
CALB2	13	No
WIF1	13	No
S100A4	13	No
IFI6	13	No
PHGDH	13	No
CHI3L1	13	No
OLIG2	13	No
PCDHB2	13	No
NPTX2	13	No
SPOCK2	13	Yes
DAPL1	13	No
MALAT1	13	Yes
HOXD13	13	No
PDZK1IP1	13	No
KRT23	13	No
TFF3	13	Yes
GPRC5A	13	No
DNER	13	No
CRYAB	13	No
PEG10	13	No
RAB34	13	No
TMEM200B	13	No
DEPTOR	13	Yes
GLDC	13	Yes
NEURL1B	13	Yes
SLFN11	13	Yes
IL20RB	13	No
PLEKHG4B	13	No
SALL4	13	Yes
IGJ	13	No
IGF2BP2	13	No
LDHB	13	No
FKBP10	13	No
CYBA	13	No
CTSK	13	No
SPRR3	13	No
NMU	13	No
ZNF750	13	No
AEBP1	13	No
STXBP6	13	No
SLC27A2	13	No
TCEAL2	13	No
GFAP	13	No
PCOLCE2	13	Yes
COL10A1	13	No
KRT14	13	No
CEACAM5	13	No
SFTA2	13	No
FN1	13	No
MAGEA4	13	No
PSAT1	13	Yes
LYPD1	13	No
STMN2	13	No
GP2	13	No
APOC1	13	Yes
BSPRY	13	Yes
HIST1H2BK	13	No
IER3	13	No
RGCC	13	No
TM4SF4	13	No
SAA1	13	No
CRABP2	13	No
BCAT1	13	No
SLC35G2	13	No
ERRFI1	13	No
HSPB8	13	No
COL6A3	13	No
KRT7	13	No
GYPC	13	No
GAS1	13	No
HIST1H4H	12	Yes
KIF26A	12	No
BCAN	12	No
VCAM1	11	Yes
TMEM184A	11	No
SFTPA2	11	No
SIX1	10	No
HPN	10	No
DKK1	10	No
CST6	10	No
CLDN3	10	Yes
GBP1	10	No
RAMP1	10	No
RGS7	10	Yes
SOX8	10	No
ERP27	9	No
BMP4	8	No
BCL11B	8	No
KRT19	7	No
SCUBE2	7	No
KRT5	7	No
HOXD10	7	Yes
RAB17	7	No
TMC4	7	No
SERPINF1	7	No
SYTL2	7	No
PDLIM4	6	No
EIF5AL1	6	Yes
FDCSP	6	No
CFAP45	6	No
SERPIND1	6	No
SRPK3	6	No
TTYH1	6	No
RBPMS2	6	No
PTPRZ1	6	No
HOMER1	6	Yes
ST6GALNAC5	6	No
C8orf48	6	No
REN	6	No
STEAP1B	6	No
CRYM	6	No
DFNA5	6	No
LGALS1	6	No
DUSP9	6	No
EPDR1	6	No
NR2F1	6	No
RGMA	6	No
IGF2BP3	6	No
LAYN	6	No
PNMT	6	No
C1orf61	6	No
NKAIN4	6	No
NDUFA4L2	6	No
MUC5B	6	No
TREM1	6	No
TENM4	6	No
BMP7	6	No
BCHE	6	No
AIM2	6	No
BARX1	6	No
SAMD13	6	No
LHFPL3	6	No
SPP1	6	No
TIMP2	6	No
C2CD4B	6	No
LMX1B	6	No
RAPGEF4	6	No
C6orf15	6	No
INPP1	6	No
FOXE1	6	No
C20orf85	6	No
CPS1	6	No
CDKN2A	6	No
AGT	6	No
DPYSL3	6	No
LHFPL4	6	No
TTC3P1	6	Yes
SUSD3	6	No
HABP2	6	No
MSX1	6	No
EDN2	6	No
STMN4	6	No
PLAGL1	6	No
THBD	6	No
SLC4A4	6	No
SPRR2A	6	No
HCAR1	6	No
MELK	6	No
SH3BGR	6	No
PCP4L1	6	No
CD8A	6	No
PI16	6	No
AQP3	6	No
MFAP5	6	No
C4orf48	6	No
CECR2	6	No
PCDHB5	6	No
BRINP3	6	No
EDIL3	6	No
GNG11	6	No
PLEKHO1	6	No
STOM	6	No
PRSS1	6	No
SLC39A10	6	Yes
JPH3	6	No
SERPINE2	6	No
LPHN3	6	No
RASSF7	6	No
ENTPD3	6	No
HOXA9	6	No
GPR143	6	No
NQO1	6	No
BMP6	6	No
CAPN6	6	No
SFRP2	6	No
KCNB1	6	No
DCLK2	6	No
CST1	6	No
AMPH	6	No
ABHD11-AS1	6	No
FRMD3	6	No
AGPAT9	6	No
TMEM45B	6	No
SULF2	6	No
FABP3	6	No
FGF13	6	No
FGB	6	No
PCK1	6	No
KCNJ4	6	No
ORM2	6	No
GSTP1	6	No
ZNF600	6	No
MUC15	6	No
LRRC3	6	No
RHOD	6	No
CAMP	6	No
VSIG2	6	No
SC5D	6	Yes
TMEM47	6	No
CD2	6	No
COL3A1	6	No
TSPAN2	6	No
CSAG1	6	No
SH3BP5	6	No
HKDC1	6	No
ASS1	6	No
ABI3BP	6	No
MT1G	6	No
RELN	6	No
FOXA2	6	No
ELOVL2	6	No
PSTPIP2	6	No
CLIC6	6	No
NASP	5	No
MEIS1	5	No
TUSC3	5	No
IL1R2	5	No
UCHL1	5	No
GPR39	5	No
ACSL1	5	No
MYL9	5	No
LTBP1	5	No
CSRNP3	5	No
TPBG	5	No
HPDL	5	No
OMG	5	No
CNTFR	5	No
CABYR	5	No
CYSTM1	5	No
PTPRD	5	No
PTGS1	5	No
DLX3	5	No
ZYG11A	5	No
HTRA3	5	No
PRAME	5	No
TFF2	5	No
AKR1B10	5	No
IGLV3-10	5	No
BMP5	5	No
OCIAD2	5	No
CD96	5	No
NAV1	5	No
KIF12	5	No
TTBK1	5	No
SMOC2	5	No
FAM131B	5	No
CAPG	5	No
POU6F1	5	Yes
SLC14A1	5	No
APOH	5	No
NKD2	5	No
RAB11FIP1	5	Yes
NSUN7	5	No
VWDE	5	No
GLIPR2	5	No
ADRA2C	5	No
PCSK5	5	No
SFRP5	5	No
CCNE1	5	No
MFSD7	4	No
SERPINB6	4	No
ABCA3	4	No
MGMT	4	No
TMEM2	4	No
ACTR3C	4	No
EBF4	4	No
MYC	4	No
TM4SF1	4	No
ABCG1	4	No
PCSK1N	4	No
DHRS2	4	No
KRT13	4	No
AKR1C2	4	No
METTL24	4	No
CEACAM1	4	No
KCNJ16	4	No
CUX2	4	No
OLFM4	4	No
CFTR	4	No
C10orf82	4	No
GC	4	No
CHST1	4	No
EN1	4	No
ESM1	4	No
KIF5A	4	No
C4orf19	3	No
HAPLN1	3	No
NNAT	3	No
PRELP	3	No
FAM46B	3	No
ECM2	3	No
NMNAT2	3	No
SERPINI1	3	No
FCN1	3	No
FGG	3	No
KLK7	3	No
PTPRN2	3	No
SLC16A4	3	No
SLC44A5	3	No
ZNF300	3	No
LRCH2	3	No
CHI3L2	3	No
ARHGEF19	3	No
TMTC1	3	No
BIRC3	3	No
CLDN5	3	No
MAP2K6	3	No
C4BPB	3	No
PVRL3	3	No
PRDX2	3	No
ITGBL1	3	No
PAWR	3	No
TMEM99	3	No
OAF	3	No
INPP4B	3	No
SCGB1D2	3	No
PLEKHA1	3	No
ANO9	3	No
HLA-C	3	No
GALK1	3	No
FEZ1	3	No
KIRREL3	3	No
ETV1	3	No
ANXA6	3	No
MOCOS	3	No
PODXL	3	No
NFKBIB	3	No
PHLDB2	3	No
GAS7	3	No
STC1	3	No
TNFAIP3	3	No
AQP5	3	No
ATP1B1	3	No
HAPLN2	3	No
KNDC1	3	No
ST3GAL5	3	No
NRIP3	3	No
ZMAT1	3	No
HPD	3	No
ARHGAP26	3	No
HPGD	3	No
PHLDA3	3	No
PALMD	3	No
PDZD2	3	Yes
LAMA1	3	No
SMOC1	3	No
GPR37L1	3	No
AGR3	3	No
SLC38A4	3	No
TRPS1	3	No
ARRDC2	3	No
MYBPC1	3	No
PROC	3	No
SDCCAG8	3	No
RWDD2B	3	No
COL11A1	3	No
STEAP2	3	No
UNC5A	3	No
FAM46A	3	No
NBEA	3	No
CLDN2	3	No
RAB20	3	No
SRGN	3	No
TMEM255A	3	No
IGHA1	3	No
PLAA	3	No
EMILIN1	3	No
CYP24A1	3	No
C1orf228	3	No
NPC1L1	3	No
GBP5	3	No
RDH16	3	No
EFEMP1	3	No
FAM110B	3	No
PLEK2	3	No
RGMB	3	No
SLC1A4	3	No
XPNPEP2	3	No
MAP7D2	3	No
IL1B	3	No
TMEM27	3	No
AKR1C4	3	No
LRRK2	3	No
ANXA10	3	No
GNMT	3	No
C7	3	No
PITPNM3	3	No
SCGB3A2	3	No
STK26	3	No
RASSF4	3	No
PRKCA	3	No
HGD	3	No
THNSL2	3	Yes
KDM5D	3	No
DDX25	3	No
LRRC34	3	No
SPOCK3	3	No
KCNMB4	2	No
IGFBP3	2	No
IGHV4-34	2	No
FSIP1	2	No
RPS4Y1	2	No
LGI3	2	No
HORMAD1	2	No
KLK6	2	No
NEK6	2	No
RGS5	2	No
POU3F2	2	No
BAX	2	Yes
GFRA1	2	No
TNFRSF18	2	No
SUCNR1	2	No
TRDC	2	No
RGS20	2	No
SLC7A5	2	No
REG3A	2	No
LPL	2	No
C6	2	No
EMILIN2	2	No
C1orf95	2	No
SLC34A2	2	No
LDOC1	2	No
NIPA1	2	No
EPCAM	2	No
C19orf40	2	No
SLC7A7	2	No
LNP1	2	No
TPSG1	2	No
KIAA1549	2	No
S100A11	2	No
PLA2G10	2	No
FEV	2	No
CALML5	2	No
ANPEP	2	No
FOXG1	2	No
F13A1	2	No
GAS2	2	No
MT1F	2	No
DEFB1	2	No
SCGB2A1	2	No
TMEM151A	2	No
ANXA3	2	No
FZD6	2	No
RAPGEFL1	2	No
MME	2	No
TSPO	2	No
ZDHHC8	2	No
PCSK9	2	No
TBC1D9	2	No
SQRDL	2	No
LPXN	2	No
RNF182	2	No
PLS1	2	No
SOX1	2	No
BCO1	2	No
DUSP1	2	No
CLDN9	2	No
VSIG1	2	No
LY6D	2	No
CDX1	2	No
LOXL4	2	No
S100A10	2	No
MGP	2	No
ORM1	2	No
FGR	2	No
PCCA	2	No
FREM2	2	No
BEX1	2	No
ENKUR	2	No
CEL	2	No
PODNL1	2	No
LRRC20	2	No
NDFIP2	1	No
C3orf70	1	No
ADSSL1	1	No
RPL22L1	1	No
SLC10A4	1	No
TUBB6	1	No
EVPL	1	No
ACADL	1	No
ATF3	1	No
SLC38A5	1	No
ABRACL	1	No
SLC44A2	1	No
FKBP1A	1	No
STYK1	1	No
TTC39A	1	No
B3GALNT1	1	No
SOCS6	1	No
CYP2W1	1	No
RGS10	1	No
IFIT3	1	No
ABCC2	1	No
PHYHIP	1	No
TMEM88B	1	No
GALNT7	1	No
NECAB2	1	No
CYB5A	1	No
UBR4	1	No
CYS1	1	No
HOXC13	1	No
LPAR6	1	No
SIGIRR	1	No
AQP11	1	No
RNF223	1	No
ICA1	1	Yes
SNX30	1	No
BHLHE40	1	No
TSPAN15	1	No
NDN	1	No
MAGEE1	1	No
GJB3	1	No
CACNA2D1	1	No
TTC39C	1	No
COL28A1	1	No
SCGB1A1	1	No
SYCP2	1	No
RLN2	1	No
TACC2	1	No
SP140	1	No
ALDH1A3	1	No
SLC5A1	1	No
LYG1	1	No
POU3F3	1	No
CD69	1	No
PCK2	1	No
ETS2	1	No
VWA3A	1	No
NLGN1	1	No
NID2	1	No
B3GNT6	1	No
NOG	1	No
POMC	1	No
TMX4	1	No
CTSE	1	No
C4orf3	1	No
FAM133A	1	No
DIRAS3	1	No
AMER2	1	No
RAB38	1	No
SHROOM1	1	No
TMEM200A	1	No
SPG20	1	No
ZNF521	1	No
OLIG1	1	No
PVRL2	1	No
GZMB	1	No
CD44	1	No
SERPINB1	1	No
PLA2G4C	1	No
YBX2	1	No
LIX1	1	No
EPB41L3	1	No
IFT46	1	No
PJA1	1	No
ZNF667-AS1	1	No
TBX3	1	No
NALCN	1	No
RNF128	1	No
NAPRT	1	No
MYLIP	1	No
RSPH4A	1	No
NINJ2	1	No
HEY1	1	No
VIM	1	No
ABCC8	1	No
UGT2A3	1	No
NRG3	1	No
ALDH2	1	No
CXCL8	1	No
MACROD2	1	No
F2RL3	1	No
LTBP2	1	No
SYT8	1	No
BMPR1B	1	No
NID1	1	No
TOP1MT	1	Yes
ADAMTS2	1	No
DCBLD2	1	No
DDX3Y	1	No
PKP1	1	No
SYK	1	No
FABP4	1	No
CCL13	1	No
RRAD	1	No
C8orf46	1	No
PDX1	1	No
NUDT11	1	No
NME3	1	No
NTNG2	1	No
MAFB	1	No
GTF2IRD1	1	No
CPA6	1	No
CD55	1	No
PRRX2	1	No
RTN1	1	No
SLC16A9	1	No
PAQR6	1	No
PLA2G1B	1	No
ACADSB	1	No
VAT1L	1	No
CADPS	1	No
EPB41L4B	1	No
LAMP3	1	No
SLC45A1	1	No
C9orf152	1	No
ABCC4	1	No
NQO2	1	No
DHRS1	1	No
PNOC	1	No
APOD	1	No
TMEM98	1	No
CBLC	1	No
BCAS1	1	No
DIO1	1	No
BCL2L15	1	No
ST6GALNAC2	1	No
FBP1	1	No
CRMP1	1	No
BAMBI	1	No
DUSP5	1	No
SCG5	1	No
C2orf40	1	No
RAB36	1	No
RBP5	1	No
KLF8	1	No
TTR	1	No
NPY	1	No
GALNT14	1	No
KISS1	1	No
TRIM38	1	No
ZNF256	1	No
LRRN3	1	No
LRRC49	1	No
NRXN2	1	No
STEAP4	1	No
SORCS2	1	No
COL4A6	1	No
ZDHHC23	1	No
CLTB	1	No
ID3	1	No
RNF130	1	No
PDE8B	1	No
NUP62CL	1	No
FKBP1B	1	No
MERTK	1	No
HLA-DPA1	1	No
CHADL	1	No
PPP1R3B	1	No
PDE4D	1	No
ULBP3	1	No
ILDR1	1	No
IFI16	1	No
UCA1	1	No
LY6K	1	No
FAM69A	1	No
ARHGAP36	1	No
HOPX	1	No
VGF	1	No
TRAV2	1	No
CPQ	1	No
TIMP1	1	No
SAT1	1	No
ADAMTS16	1	No
SLC3A1	1	No
PTGER4	1	No
TSPAN7	1	No
CYP2B6	1	No
TRABD2A	1	No
GSTA1	1	No
PPP1R9A	1	No
GSTZ1	1	No
SPTSSB	1	No
TFF1	1	No
SERPINB3	1	No
FAM134B	1	No
GHR	1	No
TENM2	1	No
C8orf4	1	No
UGT2B17	1	No
APP	1	No
GNAO1	1	No
PAQR8	1	No
RBP7	1	No
GAA	1	No
PHKG1	1	No
SLC38A3	1	No
FOXF2	1	No
GPNMB	1	No
COCH	1	No
GALNT13	1	No
FAM83A	1	No
HRASLS	1	No
OGDHL	1	No
GLYATL2	1	No
ZNF812	1	No
DNAJC12	1	No
SPINK4	1	No
CD9	1	No
ABCB1	1	No
APCDD1L	1	No

## Sheet: doxorubicin
	Tissue Freq.	Identified using LASSO?
ADAMTS1	13	No
ERP27	13	No
CCL8	13	Yes
ANXA10	13	No
ALDH5A1	13	No
PRSS21	13	No
KIF1A	13	No
PDIA5	13	No
LRRN1	13	No
TANC2	13	No
OPCML	13	Yes
KIAA1644	13	Yes
SLC7A4	13	No
AGR2	13	No
SCG2	13	No
AGPAT9	13	No
LRRC32	13	Yes
CASQ1	13	Yes
EEF1A2	13	No
MAP1A	13	Yes
COL17A1	13	No
FAM3D	13	No
CRYAB	13	No
FBXO32	13	No
SCG5	13	No
CLDN2	13	No
TUBA4A	13	No
NAALADL2	13	Yes
TMEM45B	13	No
HSPA4L	13	No
HMOX1	13	No
NPTX1	13	No
AGR3	13	No
BCHE	13	No
XDH	13	No
CAPG	13	No
SYTL2	13	Yes
RTP4	13	Yes
PLS1	13	No
COL10A1	13	No
CKMT2	13	Yes
DSP	13	No
BST2	13	No
S100A2	13	No
KRT13	13	No
TSPAN13	13	No
SLFN11	13	Yes
IGHA1	13	No
PPL	13	No
P2RY12	13	Yes
PPARG	13	No
PLIN2	13	No
SLC35G2	13	No
DNER	13	No
NDP	13	No
AOX1	13	No
C1orf61	13	No
ID2	13	No
FBXL16	13	No
MUC4	13	Yes
OLIG2	13	No
KIF5A	13	No
DDIT4L	13	No
CADM3	13	No
TFF3	13	No
S100P	13	No
ACKR4	13	Yes
CYB5A	13	Yes
RP11-35N6.1	13	No
FAM20C	13	No
PRRX1	13	No
ERICH5	13	No
MOB3B	13	No
MUC1	13	No
CRLF1	13	Yes
MGST1	13	No
DPP4	13	No
LARP6	13	No
GSTA2	13	No
GABBR2	13	No
FMOD	13	Yes
ROBO2	13	No
VNN1	13	No
PLAU	13	Yes
NRCAM	13	Yes
TSPYL5	13	No
PTGS2	13	No
MYH7	13	No
C1QL1	13	No
COL9A3	13	No
GLDC	13	No
PLEKHO1	13	No
S100A11	13	No
LRP2	13	Yes
PI3	13	No
ALDH3A1	13	No
SLC1A2	13	No
NGF	13	Yes
FAM133A	13	No
NME3	13	Yes
PSD2	13	Yes
CXCR6	13	No
CTSE	13	No
NMU	13	No
TCEA3	13	Yes
C9orf40	13	Yes
FERMT3	13	No
ICAM3	13	No
CTTNBP2	13	No
CACNG4	13	No
BCL2A1	13	No
TUSC3	13	No
PLA2G10	13	No
HAPLN1	13	No
HGD	13	No
IGHV3-13	13	No
VTCN1	13	No
SLC22A17	13	Yes
ENTPD3	13	Yes
CA8	13	No
CALML5	13	No
GRPR	13	Yes
NAPRT	13	No
CPA3	13	No
ABCB1	13	Yes
PCSK1N	13	No
ABHD11-AS1	13	Yes
MT1E	13	No
FLRT3	13	No
STOM	13	No
NAV3	13	Yes
MAGEA4	13	No
IFI6	13	No
TAC1	13	No
PRR15	13	No
C10orf82	13	No
CDKN2A	13	No
SOX8	13	No
CLPSL1	13	Yes
SULF2	13	No
FST	13	No
STEAP4	13	No
GPM6A	13	No
CST4	12	No
CLDN4	12	No
FAM149A	12	No
PTGER4	12	No
CD200	12	No
FBP1	11	No
SALL4	11	Yes
NTN1	11	No
CAMP	11	No
SAMD9	11	No
PVRL3	11	No
UBE2E2	11	No
ENPP2	11	No
PTGFR	11	Yes
SCD	11	No
FAM83F	11	No
HPGD	11	No
KCNK15	11	No
BRF2	11	Yes
PMP2	11	No
APOBEC3B	11	No
FAM20A	11	Yes
MICU3	11	Yes
C7	11	No
SGK1	11	No
TRBC2	11	No
IDO1	11	No
GTSF1	10	No
TMCC2	10	No
KRT19	10	No
PHACTR3	10	No
CENPV	10	No
DDIT4	10	No
SERPINA1	10	No
SMOX	10	No
OLFML3	10	No
DLL3	10	No
ST3GAL6	10	No
ERRFI1	10	No
TK1	10	No
TRIB3	10	No
PLA2G2A	10	No
SYCP2	10	No
AOC1	10	No
GBP5	10	No
DERL3	9	No
NPY	9	No
HSPA2	9	No
MMP1	9	No
FAIM2	9	No
PIEZO2	8	No
TDRD7	8	No
TEKT2	8	No
SUSD3	8	No
HTRA3	8	No
CHST6	8	No
ITGB6	8	No
CHGA	8	No
SERPINB5	8	No
NID2	8	No
RFX5	8	Yes
GGT6	8	No
RASGEF1A	8	No
SLC38A11	8	No
MT3	8	No
DUSP5	8	No
PLA2G4F	8	No
SAMD5	8	No
ARHGAP24	8	Yes
RORA	8	Yes
NTNG2	8	No
ATP13A4	8	No
PITX1	8	No
IFI27	8	No
GPR87	8	No
GPNMB	8	No
MUC6	8	No
PIGR	8	No
PRAME	8	No
PDLIM1	8	No
PPAP2C	8	No
COL1A2	8	No
ASPHD1	8	No
JUP	8	No
CD14	8	Yes
KHDRBS3	8	No
IGHA2	8	No
PCSK5	8	No
PLA2G1B	8	No
SERPINA6	8	No
HBQ1	8	No
CHI3L1	8	No
DLGAP1	8	No
TSPAN1	8	No
BMP2	8	No
FOLR1	8	No
CENPJ	8	Yes
ST6GALNAC2	7	No
HIST1H1C	7	No
MMP13	7	Yes
MID1IP1	7	Yes
TMEFF2	7	No
MAGEA1	7	No
SIM2	7	No
PCSK9	7	No
MNX1	7	No
STK32A	7	No
FRMD5	7	No
MKRN3	7	No
HBB	7	No
CYP27C1	7	Yes
FAM169A	7	No
F10	7	No
RGS10	7	No
CCDC184	7	No
COL7A1	7	No
SSTR1	7	No
APLN	7	No
PLAA	7	Yes
PSAT1	7	No
FGFR3	7	No
KCTD12	7	No
PID1	6	No
GIMAP2	6	No
NDN	6	No
SKAP2	6	No
GUCY1B3	6	No
PYY	6	No
PCDHB10	6	No
C5orf30	6	Yes
OASL	6	No
POU5F1	6	No
HOXB2	6	No
HSPA1B	6	No
PPAPDC1A	6	No
ADCY5	6	No
CAPN9	6	Yes
PPP2R2C	6	No
AQP4	6	No
PDIA3	6	Yes
PPAP2B	6	No
P3H2	6	No
SLC26A3	6	No
SYT1	6	No
ROS1	6	No
PANK1	6	No
SLC6A11	6	No
LAMA1	6	No
KRT15	6	No
ACN9	6	No
TPSAB1	6	No
MOXD1	6	No
TRIM22	6	No
HMGA2	6	Yes
PXDN	6	No
BBOX1	6	No
CCDC160	6	No
COL6A3	6	No
IGFL1	6	No
IGHM	6	No
MDFIC	6	No
NEURL1B	6	No
NUP62CL	6	No
SNHG14	6	Yes
ALCAM	6	No
IL24	6	No
MRPS26	6	Yes
LY96	6	No
VSIG2	6	No
C10orf11	6	No
SFTPA1	6	No
GRIA4	6	No
TENM2	6	No
CECR6	6	No
ERBB3	6	No
GLIPR1	6	No
COL3A1	6	No
TM4SF1	6	No
UGT2B15	6	No
AKNA	6	No
CD55	6	No
PAQR8	6	No
FGF1	6	No
CXCR4	6	No
DNAH5	6	No
HPD	6	No
PADI3	6	No
RPL22L1	6	No
TJP2	6	No
AKR1B10	6	No
FOXC1	6	No
CLDN16	6	No
HHEX	6	No
CTSC	6	No
COL18A1	5	No
RNF130	5	No
C12orf56	5	No
ADM	5	No
TMCC3	5	No
ADH1C	5	No
PKP3	5	No
BMX	5	No
WIF1	5	No
TSPAN8	5	No
VSIG1	5	No
NINL	5	No
FGL1	5	No
CXXC5	5	No
BMPR1B	5	No
SPOCK1	5	No
HMGN5	5	No
C3orf14	5	No
ARL9	5	Yes
PDPN	5	No
TENM4	5	No
NNAT	5	No
GCNT3	5	No
VCAN	5	No
GLYATL2	5	No
RERG	5	No
MUC2	5	Yes
FIBCD1	5	No
PTK7	5	Yes
SIX3	5	No
NTRK2	5	No
SPRR2D	5	No
ANGPT2	5	Yes
CCDC152	5	No
TWIST1	5	No
UCA1	5	No
TNNI3	5	No
ACTA2	5	No
ATF5	5	No
ALDH3B1	5	No
GLB1L2	5	No
SLC22A3	5	No
GGT5	5	No
REN	5	No
FZD1	5	No
CARD11	5	No
AADAC	5	No
GXYLT2	5	No
GOLGA8A	5	No
DFNA5	5	No
AOC3	5	No
NTS	5	No
MIR17HG	5	No
IL7R	5	No
TESC	5	No
ZC2HC1A	5	No
REC8	5	No
FOSL1	5	No
PLK2	5	No
KCNN4	5	No
VEPH1	5	No
MINPP1	5	No
ANGPTL4	5	No
NME4	5	No
LARGE	5	No
SOWAHA	5	No
KDELR3	4	No
COL4A5	4	No
CPPED1	4	No
RAMP1	4	No
NLRP1	4	No
KIF5C	4	No
KRTDAP	4	No
OIP5	4	No
BAI1	4	No
MORN5	4	No
ONECUT2	4	No
DPT	4	No
BEX4	4	No
PABPC1L	4	No
TNFSF10	4	No
PITPNM3	4	No
C12orf57	4	No
TICRR	4	No
EOMES	4	No
MUC5B	4	No
CALB2	4	No
SMOC1	4	No
RERGL	4	No
ITGA11	4	No
CCL26	4	No
MMP11	4	No
ODAM	4	No
CAV2	4	No
CPLX2	4	No
GPR123	4	No
EGFLAM	4	No
PTGER1	4	No
A2ML1	4	No
NR0B1	4	No
MYEF2	4	No
F2RL1	4	No
MT1G	4	No
CDH18	4	No
CSRP2	4	No
CDC37L1	4	Yes
GALNT7	4	No
CYP39A1	4	No
GYPC	4	No
AKAP6	4	No
TFF1	3	No
QPCT	3	No
C6	3	No
CCNE1	3	No
HRASLS	3	No
CHCHD7	3	No
ASPA	3	No
CLIP4	3	No
GULP1	3	No
APLP1	3	No
NEURL1	3	No
PNMT	3	No
GKAP1	3	No
CLIC3	3	No
ASAP3	3	No
DIO1	3	No
ADORA1	3	No
DPF1	3	No
CEP295	3	No
NAT8B	3	No
GDF11	3	No
IGHV1-69	3	No
FIBIN	3	No
TMEM55A	3	No
GCNT2	3	No
PDLIM4	3	No
GPR68	3	No
WBSCR27	3	Yes
KBTBD12	3	Yes
FGB	3	No
PLEKHM1	3	No
CRISP3	3	No
PTPRD	3	No
ATAD3C	3	No
STRIP2	3	No
C21orf33	3	No
B3GALTL	3	Yes
ARHGAP18	3	No
WNT7A	3	No
PRNP	3	No
IQSEC3	3	No
DNAJC12	3	No
ZNF331	3	No
SLIT2	3	No
F3	3	No
SFTPB	3	No
AC011242.6	3	No
PPP1R3D	3	Yes
PLA2G5	3	No
TRIP6	3	No
H1F0	3	No
ID4	3	No
CFP	3	No
BANK1	3	No
PREX1	3	No
SEMA5A	3	No
PNMA2	3	No
ANXA3	3	No
GC	3	No
GATA2	3	No
HTRA1	3	No
PCOLCE2	3	No
LOXL1	3	No
CHST4	3	No
FN1	3	No
SHROOM3	3	No
GJB2	3	No
SIRPA	3	No
GAL	3	No
LRIF1	3	No
RNF128	3	No
SLC45A3	3	No
CCL13	3	No
MYT1	3	No
TNS4	3	No
EDN1	3	No
TUBA1A	3	No
RGN	3	No
FAM57A	3	No
CNN3	3	No
EPSTI1	3	No
RASL10A	3	No
DPYD	3	No
SLC10A4	3	No
SFRP2	3	No
GBP2	3	No
KCNMB1	3	No
COL14A1	3	No
SULT1B1	3	No
CCDC92	3	No
TSPAN5	3	No
HTR2B	3	No
SP8	3	No
MPEG1	3	No
EPHA1	3	No
NANOS1	3	No
ABI3BP	3	No
PRSS1	3	No
LPAR3	3	No
ILDR2	3	No
HOXA9	3	No
VAMP5	3	No
OCA2	3	No
HOXA2	3	No
PLCE1	3	No
DAPL1	3	No
SEZ6L	3	No
TMIE	3	No
RBPMS2	3	No
SELM	3	No
HSD17B14	3	No
GINS4	3	No
SHISA4	3	No
HSD17B8	3	No
SDR16C5	3	No
BCL2L15	3	No
B3GNT9	3	No
COL4A6	3	No
TNFRSF18	3	No
KRT7	3	No
TNFAIP3	3	No
NRN1	3	No
DKK4	3	No
C10orf107	3	No
SPEF1	3	No
FABP6	3	No
LPL	3	No
ALDH1A1	3	No
ZBTB7C	3	No
THBD	3	No
CRNDE	3	No
PNCK	3	No
MYOM2	3	No
SFRP5	3	No
NEFH	3	No
KLK12	3	No
DMRT2	3	No
TACSTD2	3	No
IGFBP3	3	No
CD2	3	No
KRT5	3	No
SEMA3B	3	No
CD96	3	No
CPE	3	No
UBE2E3	3	No
LMX1B	3	No
SYT4	3	No
RFFL	3	No
ZNF486	3	No
MARC1	3	No
FOCAD	3	No
C4BPB	3	No
KCP	3	No
GPR116	3	No
PLVAP	3	No
CEACAM5	3	No
RP11-44F21.5	3	No
ZEB1	3	No
SDC2	3	No
PHLDA3	3	No
TNFSF11	3	No
GPR171	3	No
IGDCC4	3	No
GNGT1	3	No
TTR	3	No
DUSP26	3	No
GREM1	3	No
SLC7A11	3	No
SLC12A2	3	No
CA14	3	No
S100A4	3	No
SFXN1	3	No
CLU	3	No
COMP	3	No
GABRA3	3	No
RPP25	3	No
CD8B	3	No
SMOC2	3	No
KCNAB1	3	No
OLIG1	3	No
LRP3	3	No
SFRP1	3	No
GBP6	3	No
ZNF649	3	No
ABCC4	3	No
SYT7	3	No
HLF	3	No
TRDC	3	No
NAP1L2	3	No
SCUBE3	3	No
ID1	3	No
HPCA	3	No
PTGER2	3	No
SERPINB6	3	No
NIM1K	3	No
TUBB6	3	No
ATP11C	2	No
FAM180A	2	Yes
SYNDIG1	2	No
HOXC13	2	No
KANK1	2	No
BRI3	2	Yes
TPSG1	2	No
TSPAN11	2	No
PABPC4L	2	No
B3GAT1	2	No
GEM	2	No
ST6GAL2	2	No
NELL2	2	No
CCNA1	2	No
MAN1A1	2	No
CABP4	2	No
ASS1	2	No
FAM110B	2	No
GALNT15	2	No
GPR126	2	No
FGD6	2	No
XIST	2	No
C6orf141	2	No
FHOD3	2	No
PACSIN1	2	No
LRRC17	2	No
PLS3	2	No
GLCE	2	No
IL1B	2	No
AGTR1	2	No
APBB2	2	No
RDH10	2	No
SLC25A18	2	No
CST5	2	No
SLC16A8	2	Yes
PYCARD	2	No
SLC35E3	2	No
DYDC2	2	No
CEACAM1	2	No
ULBP2	2	No
GNAI1	2	No
ZYG11A	2	No
HLA-DRA	2	No
HHIP	2	No
HIVEP3	2	No
CCR4	2	No
GABRE	2	No
ZNF83	2	No
ASNS	2	No
SDK2	2	No
E2F5	2	No
AZGP1	2	No
GSTP1	2	No
ZNF404	2	No
BSPRY	2	No
SLC35F1	2	No
HIST1H3D	2	No
FAM134B	2	No
SNCG	2	No
GRAMD3	2	No
IER5L	2	No
COL16A1	2	No
XYLT1	2	No
SLC38A6	2	No
LMO2	2	No
KRTCAP3	2	No
CD27	2	No
RPL34	2	No
PYGL	2	No
TNFSF4	2	No
MMP19	2	No
CX3CR1	1	No
IGF2BP2	1	No
AQP5	1	No
COLCA2	1	No
BTC	1	No
CST6	1	No
IGLL5	1	No
CNTN3	1	No
FAM171B	1	No
CHMP4C	1	No
ANO1	1	No
SLC6A17	1	No
POMC	1	No
SPRR2A	1	No
C3	1	No
PRICKLE1	1	No
ADHFE1	1	No
ZDHHC22	1	No
NT5E	1	No
FAM198A	1	No
CD44	1	No
SLC1A3	1	No
FAIM3	1	No
GSC	1	No
SNX10	1	No
NEAT1	1	No
ME1	1	No
PTCHD2	1	No
SST	1	No
CENPU	1	No
MAOB	1	No
TDRD10	1	No
ARL4D	1	No
KCNK1	1	No
MGAT5B	1	No
DHRS7	1	No
ALOX15	1	No
ARRDC4	1	No
COX7A1	1	No
NIPSNAP3A	1	No
NEFM	1	No
RAB34	1	No
ENHO	1	No
CXCL17	1	No
UST	1	No
C17orf97	1	No
MAGED1	1	No
STRA6	1	No
ADTRP	1	No
MGMT	1	No
FER1L4	1	No
CSAG1	1	No
SFTPA2	1	No
RPS4Y1	1	No
PRKG2	1	No
PSD3	1	No
ATP8A2	1	No
BIK	1	No
ACSF2	1	No
TNFRSF10C	1	No
PTPRM	1	No
JAZF1	1	No
EPHX1	1	No
DCLK1	1	No
TMPRSS11E	1	No
ITGBL1	1	No
STAMBPL1	1	No
PBK	1	No
PCDHB5	1	No
HPN	1	No
CADPS2	1	No
SEZ6	1	No
RP11-43F13.1	1	No
RASIP1	1	No
KIF26B	1	No
DYNLRB2	1	Yes
OBP2B	1	No
SLC35F3	1	No
IRX4	1	No
PPAPDC3	1	No
FAM213A	1	No
HHLA2	1	No
WNT2	1	No
FAM49A	1	No
WASF3	1	No
AFAP1L2	1	No
TIMP1	1	No
ZMYND12	1	No
PTPRN	1	No
SEMA4A	1	No
FREM2	1	No
GPR110	1	No
TRAM2	1	No
PIP	1	No
C6orf222	1	No
CTSH	1	No
TBX10	1	No
OVGP1	1	No

## Sheet: bicalutamide
	Tissue Freq.	Identified using LASSO?
DNER	13	No
STK26	13	No
CEACAM5	13	Yes
IRS2	13	No
MEST	13	Yes
CRYAB	13	No
KRT14	13	No
SLC7A2	13	No
CHGA	13	No
RGCC	13	Yes
SDC2	13	No
NMNAT2	13	Yes
GPRC5A	13	No
CHI3L1	13	No
PHGDH	13	Yes
SPOCK1	13	No
SCGB3A2	13	No
PITX1	13	Yes
KRT19	13	No
CXCL5	13	No
PTN	13	No
KHDRBS3	13	No
ARHGDIB	13	No
CLIC3	13	No
TNFSF10	13	Yes
TM4SF1	13	No
CLDN4	12	No
IL1A	12	No
SYTL2	12	No
PCSK1N	12	No
CEACAM6	12	No
DUSP23	11	Yes
PRAC1	10	No
DNAJC12	10	No
SPP1	10	No
CRABP2	10	No
PCOLCE2	10	No
NOV	10	No
UCA1	10	No
SULT2B1	10	Yes
IL4I1	10	No
PNMAL1	10	No
OLFM4	10	No
KRT6B	10	No
TFF1	10	No
ROBO2	10	Yes
RPL39L	10	No
GJB1	10	No
IFI27	10	No
FAIM2	10	Yes
TPBG	10	No
PLAU	10	No
OMD	10	Yes
CALB2	10	Yes
SST	10	No
SPINK1	10	No
PI3	10	No
FDCSP	10	No
GATM	10	No
BEX1	9	No
PCDH19	9	Yes
TFPI	9	No
WIF1	9	No
EPSTI1	9	No
TNN	9	Yes
SPRR1A	9	No
HTATIP2	9	No
PDGFD	9	Yes
ASTN1	9	No
GPR37	9	No
GADD45B	9	No
CYBA	9	No
STOX2	9	No
PEA15	9	No
SLC6A8	9	No
CXCL1	9	No
SAA1	9	No
MAP7D2	9	Yes
ZNF600	9	Yes
PROS1	9	Yes
SEPT11	9	Yes
AOC1	9	No
GUCY1B3	8	No
PROM2	8	No
TGFBR3	8	No
C1QL1	8	No
GZMA	8	Yes
PCDHB10	8	No
ANKEF1	8	No
RTN4RL1	8	Yes
CAV1	8	No
CPB1	8	No
TESC	8	No
IRX5	8	No
NDNF	8	No
RP11-43F13.1	8	Yes
SCUBE2	8	No
VSTM2B	8	No
OPN3	8	No
SCGB1A1	8	No
PCDHB14	8	Yes
GPNMB	8	No
FREM2	8	No
DKK1	8	No
FNDC1	8	No
KIAA1324	8	No
CIART	8	Yes
WT1	8	No
POSTN	8	No
SNCAIP	7	No
GALNT5	7	No
ELF5	7	No
MGST1	7	No
CCND1	7	No
WLS	7	No
TXLNGY	7	No
CA2	7	No
KLRG2	7	No
PLLP	7	Yes
COL2A1	7	No
C4BPB	7	No
FAM107A	7	No
FGF1	7	No
COL6A3	7	No
CTSK	6	No
P4HA3	6	Yes
FOXF1	6	No
SLC43A1	6	No
ALDOB	6	No
KCTD14	5	No
PXDN	5	No
EYA1	5	No
NPM3	5	No
PMEPA1	5	No
LGMN	5	No
GALNT3	5	No
RPS4Y1	5	No
CILP2	5	Yes
TMSB15A	5	No
LRRN3	5	No
FKBP10	5	No
TMEM246	5	No
CPVL	5	No
CCL28	5	No
IRX3	5	No
APLN	5	No
SFRP1	5	No
C3	5	No
PYCARD	5	No
CADPS	5	No
IFITM3	5	No
LRRTM3	5	No
HEPACAM	5	No
ID2	5	No
LGALS3	5	No
HOXB2	5	No
TMEM190	5	Yes
E2F5	5	No
COL10A1	5	No
S100P	5	No
SMAD1	5	No
TIMP1	5	No
C3orf14	5	No
ZNF83	5	No
ATL1	5	Yes
HBB	5	No
MARCO	4	No
NAV1	4	No
DHRS9	4	No
ZNF521	4	No
PDZK1IP1	4	No
C15orf48	4	No
CP	4	No
MEDAG	4	No
COL22A1	4	No
SERPINA3	4	No
PLBD1	4	No
MMP13	4	Yes
MAP3K5	4	No
VAV3	4	No
CTSC	4	No
SPATC1L	4	No
LIPH	4	No
GFOD1	4	No
CLDN3	4	No
BZW2	4	Yes
CIDEC	4	No
GLDC	4	No
PARM1	4	No
UBE2E2	4	No
SERPINB3	4	No
VSIG1	4	No
ZNF560	4	No
DNAJA4	4	No
CMTM7	4	No
SH3RF3	4	No
TMPRSS4	4	No
FAIM3	4	No
EIF1AY	4	No
PRAME	4	No
NPR3	4	No
KIF5A	4	No
DIRAS2	4	No
NID2	4	No
SLC12A7	4	No
CRLF1	4	No
ST6GAL2	4	Yes
MS4A15	3	No
FAM149A	3	No
MYOF	3	No
NQO1	3	No
KCNMA1	3	No
LRRC3B	3	No
KRT86	3	No
FOXG1	3	No
DPP6	3	No
MUC15	3	No
NEURL1B	3	No
COCH	3	No
COL9A3	3	No
PSAT1	3	No
PCDHB9	3	No
S100A6	3	No
CABLES1	3	Yes
GRPR	3	No
DPYSL3	3	No
FEZ1	3	No
NT5E	3	No
ALDH2	2	No
EGLN3	2	No
POU3F3	2	No
PKIB	2	No
TMEM141	2	No
ATP9A	2	No
HSPA2	2	No
EMB	2	No
LRRN4	2	No
TNNC1	2	No
CATSPERB	2	No
NDRG1	2	No
PLCXD3	2	No
CABLES2	2	No
HBEGF	2	No
ASIC1	2	No
PAQR8	2	No
CPLX2	2	No
NCAN	2	No
SCT	2	No
CCL11	2	No
TMEM184A	2	No
SNAI2	2	No
TMEM98	2	No
STMN2	2	No
CTNNA2	2	No
CHRM3	2	No
PF4	2	No
GRIK5	2	No
CCDC109B	2	No
SELM	2	No
CDC42EP5	2	No
ANPEP	2	No
EVPL	2	No
DPP4	2	No
FBP1	2	No
STC1	2	No
VSTM2L	2	No
HMOX1	2	No
FUT8	2	No
TNFAIP6	2	No
TRIM36	2	No
DOCK10	2	No
APOBEC3B	2	No
MAP2K6	2	No
SYNE4	2	No
HMGN5	2	No
MCTP2	2	Yes
RERG	2	No
LRRTM2	2	No
IGFL2	2	No
LYPD3	2	No
GPRC5C	2	No
IGSF21	2	No
MNDA	2	No
KLK6	2	No
ARHGAP24	2	No
TSPAN13	2	No
SEPP1	2	No
MANSC1	2	No
SEZ6L	2	No
KCNK1	2	No
SORL1	2	No
ZNF789	2	Yes
RAB26	2	No
CASP6	2	No
PXMP4	2	No
SCG5	2	No
SIX1	2	No
MAGEA1	2	No
ADM	2	No
HOXD9	2	No
KCNN4	2	No
SLC24A3	2	No
LAPTM4B	2	No
TNFSF11	2	No
COL14A1	2	No
C5	2	No
C2orf43	2	Yes
MAPK8IP1	2	No
TCEAL1	2	No
SLAIN1	2	No
ATRNL1	2	No
LPIN3	2	No
LY6D	2	No
TM6SF1	2	Yes
COL4A4	2	No
MAPK15	1	No
HIST1H4H	1	No
CD83	1	No
CRABP1	1	No
ITPKA	1	No
GREM1	1	No
ADRA2C	1	No
MATN3	1	No
SPINT1	1	No
EEF1A2	1	No
ATL3	1	No
LGALS3BP	1	No
CHST9	1	No
PDCD2L	1	No
GAL	1	No
CLIC5	1	No
RGS17	1	No
LINC00839	1	No
UGT2B7	1	No
KLF5	1	No
CXCR6	1	No
TFF2	1	No
CDKN2A	1	No
ACTG2	1	No
MAN2A1	1	No
CNKSR3	1	No
KCNJ16	1	No
DSC3	1	No
BRINP3	1	No
LRRC32	1	No
C19orf25	1	No
KRT80	1	No
PLXNC1	1	No
MYO10	1	No
ANO9	1	No
COL7A1	1	No
BCL11B	1	No
RHOV	1	No
CXCL3	1	No
SERPINB4	1	No
IDH2	1	No
VAMP5	1	No
PLA2G10	1	No
IGF2BP2	1	No
SOX21	1	No
TRPV4	1	No
SGK1	1	No
SLC45A3	1	No
S100A16	1	No
SUSD3	1	No
LYZ	1	No
PTPN1	1	No
VIPR2	1	No
ETNPPL	1	No
TMTC1	1	No
PPAPDC1B	1	No
NRIP3	1	No
ENTPD3	1	No
ADORA2B	1	No
ERICH5	1	No
KLHDC7B	1	No
PIP	1	No
HAS2	1	No
CHST8	1	No
TRPA1	1	Yes
FAM221A	1	No
CA11	1	No
COL26A1	1	No
TFPI2	1	No
AKR1C3	1	No
CCL8	1	No
ANKRD65	1	No
MX1	1	No
ANXA3	1	No
HRASLS	1	No
LONRF3	1	No
PPP1R1B	1	No
TOX2	1	No
HTR2B	1	No
GPD2	1	Yes
PRIMA1	1	No
KIF12	1	No
PNOC	1	No
C8orf4	1	No
SDR16C5	1	No
HLA-DRB5	1	No
TENM2	1	No
GPR137B	1	No
COLCA1	1	No
ATP6AP1	1	Yes
BARX2	1	No
UNC5CL	1	No
DSG2	1	No
PROM1	1	No
CPA4	1	No
AKR1B15	1	No
NUAK2	1	No
HLA-C	1	No
ETV7	1	No
TMEM35	1	No
PLN	1	No
E2F1	1	No
NUPR1L	1	No
FGD6	1	No
SLC38A1	1	No
GALNT15	1	No
WSCD1	1	No
SPSB2	1	No
CYR61	1	No
PLEKHG4B	1	No
SHISA9	1	No
ASPDH	1	No
CREB5	1	No
F12	1	No
PDPN	1	No
CLEC2L	1	No
IQGAP1	1	No
DHDH	1	No
ITIH5	1	No
MMP10	1	No
COL11A1	1	No
M1AP	1	No
STRADB	1	No
ARMCX5	1	No
C6	1	No
SYT6	1	No
HERC6	1	No
NPAS2	1	No
TBX1	1	No
FBN3	1	No
C6orf15	1	No
FAM181B	1	No
ADORA3	1	No
DSE	1	Yes
A2ML1	1	No
CARTPT	1	No
PTPRZ1	1	No
MFSD6L	1	No
GALNT12	1	No
ANXA5	1	No
HORMAD1	1	No
TJP2	1	No
TMOD1	1	No
SLC5A8	1	No
IGFBP5	1	No
CCL17	1	No
OCIAD2	1	No
TFF3	1	No
ASNS	1	No
SIMC1	1	No
C21orf33	1	No
DNAJB13	1	Yes
PI15	1	No
CYP24A1	1	No
C15orf59	1	No
TMEM47	1	No
PRSS3	1	No
CYP2R1	1	No
LRIG1	1	No
SEMA3E	1	No
PLEKHN1	1	No
ZNF204P	1	No
PDLIM3	1	No
CTSW	1	No
EXOC3-AS1	1	Yes
WNT10A	1	No
MUCL1	1	No
IRX4	1	No
MED11	1	No
ZNF256	1	No
GRIA2	1	No
SFRP5	1	No
SCN2B	1	No
ARTN	1	No
EPHX2	1	No
SERPINB5	1	No
DOK2	1	No
LXN	1	No
ARHGEF19	1	No
GPR1	1	No
SATB2	1	No
CCDC3	1	No
C12orf75	1	No
HPX	1	No
ST3GAL6	1	No
SCGB2A2	1	No
CCL22	1	No
PTGDS	1	No
ROPN1L	1	No
CCL24	1	No
DOCK11	1	No
DTX4	1	No
ZNF593	1	No
PHACTR3	1	No
ELOVL2	1	No
IL1B	1	No
SSBP2	1	No
PPP2R2C	1	No
EVA1C	1	No
CACNB4	1	No
HSPB8	1	No
ISM1	1	No
VIM	1	No
MACROD2	1	No
ASPHD2	1	No
LRRC6	1	No
TMEM100	1	No
GC	1	No
MT1G	1	No
DEFB1	1	No
DENND2D	1	No
CDC42EP3	1	No
PSTPIP2	1	No
ZDBF2	1	No
ROS1	1	No
FN1	1	No
SLITRK2	1	No
F13A1	1	No
FILIP1L	1	No
FAM43B	1	No
ATP11A	1	No
GULP1	1	No
SLCO4A1	1	No
IGLV8-61	1	No
CFD	1	No
PBDC1	1	No
CTNNA1	1	Yes
S100A2	1	No
TTC39C	1	No
TMIGD2	1	No
SSTR1	1	No
FGF18	1	No
WFDC1	1	No
PLS1	1	No
HSPA1A	1	No
LDHB	1	No
PDGFRL	1	No
AGR2	1	No
SEMA6A	1	No
ANXA10	1	No
CLMN	1	No
CTGF	1	No
SLC39A5	1	No
JAZF1	1	No
PDE6D	1	Yes
LRRC31	1	No
CDHR1	1	No
CAPN6	1	No
TRIB2	1	No
AFF3	1	No
MSX1	1	No
NOS2	1	No
ITGB6	1	No
CBR3	1	No
DYNC1I1	1	No
KIF5C	1	No
ABHD12	1	Yes
PRKCA	1	No
FOSB	1	No
ARSE	1	No
KLHDC4	1	No
FAM105A	1	No
GPX7	1	No
ATP1B2	1	No
PLCG2	1	No
SERPINI1	1	No
CFI	1	No
HTRA1	1	No
FAM162B	1	No
PLEKHB1	1	No
B3GALT1	1	No
TAGLN3	1	No
ABCG2	1	No
GYPC	1	No
TRIM17	1	No
ORM2	1	No
SLC25A4	1	No
SMARCD3	1	No
CASQ1	1	No
PGC	1	No
TRERF1	1	Yes
EGFL6	1	No
GZMK	1	No
TMSB4Y	1	No
APOC1P1	1	Yes
RTN1	1	No
ADAM28	1	No
OCA2	1	No
ALPP	1	No
NRCAM	1	No
SCEL	1	No
FAM196A	1	No
CDCA7L	1	No
DZIP1	1	No
CACNA1A	1	No
TREM1	1	No
MXRA5	1	No
GPR157	1	No
SNTA1	1	No
NRK	1	No
C7orf57	1	No
STX18	1	No
RNF223	1	No
TFEC	1	No
FOCAD	1	No
AGTR1	1	No
SYNGR3	1	No
PTX3	1	No
CA8	1	No
MMP1	1	No
TSPAN8	1	No
MSLN	1	No
FDFT1	1	No
CNTFR	1	No
ARSD	1	No
UGT2A3	1	No
KCNT2	1	No
CORO2B	1	No
PLEKHA5	1	No
GPR173	1	No
TMEM255A	1	No
FAR2	1	No
ALPPL2	1	No
PHYHIPL	1	No
ASPN	1	No
NPY1R	1	No
F2R	1	No
ACP5	1	No
APOF	1	No
ACTRT3	1	No
CD200	1	No
FLRT3	1	No
RASSF9	1	No
ZIC1	1	No
PRDX2	1	No
KRTDAP	1	No
SLC39A4	1	No
PTGIS	1	No
FAM13C	1	No
PCDH9	1	No
CWH43	1	No
CCL19	1	No
KNDC1	1	No
NME4	1	No
MPC1	1	No
SBSN	1	No
CMBL	1	No
FGFBP2	1	No
LUM	1	No
CD177	1	No
COLGALT2	1	No
IVD	1	No
LPHN3	1	No
ARL4A	1	No
RASEF	1	No
DES	1	No
SLC38A4	1	No
ETFA	1	No
CCNI2	1	No
GJB5	1	No
FST	1	No
CKB	1	No
LRRC34	1	No
SERPINA5	1	No
GLB1L2	1	No
DNASE1L2	1	No
LGI3	1	No
TCN1	1	No
THY1	1	No
MT1M	1	No
DOK5	1	No

## Sheet: veliparib
	Tissue Freq.	Identified using LASSO?
C19orf33	13	No
THBS2	13	No
SLFN11	13	Yes
TFF1	13	No
FN1	13	No
KRT23	13	No
DUSP23	13	No
FDCSP	13	No
PEA15	13	Yes
TMEM45B	13	Yes
TMEM45A	13	No
TSPYL5	13	No
KRT7	13	No
DSG3	13	No
CHI3L1	13	Yes
ADA	13	Yes
SPINK1	13	No
LRRN1	13	No
PSAT1	13	No
PI3	13	No
ZNF667-AS1	13	No
SPOCK1	13	No
TESC	13	No
C1QL1	13	No
TMTC1	11	Yes
BMP4	11	No
C3orf14	11	No
DNER	10	No
MFAP5	10	No
BMP7	10	No
MUC5B	10	No
PLA2G2A	10	No
NPY	10	No
PHGDH	10	No
SCD	10	No
NUDT11	10	No
CALB2	10	No
CXCL14	10	No
BCAT1	10	No
SST	10	No
CADM2	10	No
C4BPA	10	No
LTF	10	No
DPYSL4	10	No
LRRN4CL	10	Yes
ABHD11-AS1	10	No
SFTPB	10	No
FAM107A	10	No
MAL	10	No
KPNA7	10	No
ALDH1A1	10	No
CCDC181	10	No
SOBP	10	No
FBXL16	10	No
DOK7	10	Yes
PRSS21	10	No
CSAG1	10	No
FES	10	Yes
VSTM2L	10	No
FOXF1	10	No
SYNE4	10	Yes
IGF2BP2	10	No
C8orf46	10	No
KRT6B	10	No
CLDN2	10	No
MGST1	10	No
BRINP3	10	No
DSG2	10	No
PCYOX1L	10	No
NPW	10	No
CD96	10	Yes
GPR64	10	No
HSD11B1	10	No
PLS1	10	No
TIMP2	10	No
CXCL9	10	No
TXLNGY	10	No
SMOC1	10	No
MOCOS	10	No
KCNB1	10	Yes
STMN2	10	No
CCL20	10	No
ALDOB	10	No
SPON2	10	No
RAB32	10	No
COL6A3	10	No
FILIP1L	10	No
APBA2	10	No
ID4	10	No
BAI1	10	Yes
NEURL1B	10	No
TPSAB1	10	No
PTGER2	10	No
ZNF600	10	No
CA2	10	No
ADRA2A	10	No
SFTPA2	10	No
STXBP6	10	No
CYP1B1	10	No
ATP6V0A4	10	No
ANXA10	9	No
ITGAL	8	No
DUSP5	8	No
NCKAP5	8	No
OLIG2	8	No
LGI3	8	No
SCGB2A1	8	No
GFRA1	7	No
COL11A1	7	No
TREM1	7	No
CRYAB	7	Yes
TPD52	7	No
RALGPS2	7	Yes
SPRR2A	7	No
TCEA3	7	No
CCL19	7	No
CSF2RB	7	No
S100A4	7	No
GZMA	7	No
STC1	7	No
TCEAL3	7	No
MME	7	No
RPS4Y1	7	No
MLKL	7	No
GAL	7	No
COL12A1	7	No
ITGB5	7	No
INPP4B	7	No
FGB	7	No
ARID5B	7	No
NGFRAP1	7	No
FKBP1B	7	No
THBS1	7	No
AAMDC	7	Yes
RAB19	7	No
LAPTM5	7	No
EDIL3	7	No
INHBB	7	No
EDNRB	7	No
ITGB7	7	No
LCP2	7	No
ITGB6	7	No
GADD45B	7	No
PCED1B	7	No
ETS2	7	No
PVRL3	7	No
DPP6	7	No
CACNG4	7	No
GSTA1	7	No
PMP2	7	No
LRRC17	7	No
NR5A2	6	No
IRX4	6	No
IL6	6	No
ZNF311	6	No
TPSG1	6	No
CCL13	6	No
MAPK4	6	No
VWA5A	6	No
NAV2	6	No
SULT1C4	6	No
CHST9	6	No
BTNL9	6	No
CADM1	6	No
FAM20C	6	No
FAM133A	6	No
HABP2	6	No
UCA1	6	No
TNNI2	6	No
CACHD1	6	No
FAM101B	6	No
TMEM59L	6	No
COL4A2	6	No
ORM2	6	No
GCH1	6	No
PCSK1N	6	No
NBEA	6	No
DNAJC22	6	No
FUCA2	6	No
FHIT	6	No
LAYN	6	No
ASPHD2	6	No
FAM198A	6	No
ERRFI1	6	No
DPEP1	6	No
CECR6	6	No
NDC80	6	No
GATM	6	No
DYNLT3	6	No
TMEM255A	6	No
ERMP1	6	No
FOXL1	6	No
KIF26B	6	No
C2orf88	6	No
HS6ST2	6	No
AADAC	6	No
PPAP2B	6	No
RHOD	6	No
ZNF812	6	No
USP53	6	No
CHST2	6	No
AGRN	6	No
CLDN9	6	No
PACRG	6	No
SLITRK6	6	No
CALML5	6	No
MALAT1	6	No
LEFTY2	6	No
TMEM171	6	No
FMO5	6	No
LEFTY1	6	No
FGF12	6	No
GEM	6	No
GLYATL2	6	No
TRIM9	6	No
GYPC	6	No
KCNMB4	6	No
CXCL11	6	No
RBPMS2	6	No
TUSC3	6	No
SOSTDC1	6	No
SPINT2	6	No
FAM181A	6	No
MAP2K6	6	No
CRIP2	6	No
LMTK3	6	No
EDN1	6	No
SLAMF7	6	No
SAMHD1	6	No
ANXA6	6	No
KRTDAP	6	No
PCP4L1	6	No
GCNT3	6	No
PLA2G12B	6	No
OPTN	6	No
FAM150A	6	No
HIST3H2A	6	No
CNKSR2	6	No
COL8A1	6	No
OSBPL10	6	No
SEMA5B	6	No
CRYM	6	No
APOBEC3A	6	No
KLK8	6	No
FFAR2	6	No
C8orf48	6	No
GMDS	6	No
ADH1C	6	No
TNFSF9	6	No
MPC1	6	No
POU3F2	6	No
BHMT2	6	No
RCBTB2	6	Yes
SPINK5	6	No
BMP2	6	No
HGD	6	No
CXCL13	6	No
TAF12	6	No
VNN1	6	No
SLAIN1	6	No
STEAP4	6	No
REEP4	6	Yes
FAIM3	6	No
POU2AF1	6	No
DES	6	No
GLDC	6	No
FOXS1	6	No
RAET1L	6	No
SNX9	6	Yes
WISP2	6	No
G0S2	6	No
COL11A2	6	No
DHRS2	6	No
EBF4	6	No
NT5M	6	No
LRRTM4	6	No
TUBB2A	6	No
BMP6	6	No
DCBLD2	6	No
EPSTI1	6	No
TUBAL3	6	No
SERPINA5	6	No
SH3GL2	6	No
C6orf52	6	No
SHC4	6	No
UCHL1	6	No
CYP2S1	6	No
CRNDE	6	No
ASTN1	6	No
LDHB	6	No
PBK	6	No
MAOA	6	No
C4orf3	6	Yes
ALDH1L2	6	No
HPR	6	No
OTUD1	6	No
ERMN	6	No
EPB41L4A	6	Yes
ITGBL1	6	No
GNG11	6	No
CLDN10	6	No
ACTG2	6	No
C11orf86	6	No
C5orf38	6	No
ANKRD24	6	No
SPX	6	No
ANPEP	6	No
MS4A8	6	No
PPP1R14A	6	No
FOXG1	6	No
TMPRSS11E	6	No
SEMA3A	6	No
TBC1D8	6	No
ARC	6	No
PTGS2	6	No
CXCR6	6	No
UGT2A3	6	No
IRX1	6	No
PTN	6	No
GPR1	6	No
SLC7A5	6	No
MOXD1	6	No
COMP	6	No
ZNF22	6	No
POU3F3	6	No
NOG	6	No
TUBB6	6	No
C4BPB	6	No
CACNA2D1	6	No
TSPEAR-AS2	6	No
CLDN16	6	No
PLVAP	6	No
COL23A1	6	No
FGF9	6	No
UNC5B	6	No
TNFSF10	6	No
ACP5	6	No
S100A1	6	No
PPAPDC1A	6	No
TMEM100	6	No
AKR1C1	6	No
IGFBP3	6	No
IFITM3	6	No
MDFIC	6	No
STAP2	6	No
CLDN18	6	No
KCNJ11	6	No
ZNF853	6	No
HSPG2	6	No
VCAM1	6	No
DCN	6	No
APOBEC3G	6	Yes
REG1A	6	No
MAFB	6	No
C20orf85	6	No
EPHX4	6	No
LYPLAL1	6	No
REN	6	No
DENND2D	6	No
HSPA1A	6	No
SEPP1	6	No
PHGR1	6	No
PPP3CA	6	No
STEAP1	6	No
C12orf56	6	No
SSTR1	6	No
ZNF860	6	No
SH3BGRL	6	No
LY6H	6	No
C1orf95	6	No
RAP1GAP	6	No
CMBL	6	No
ZNF428	6	No
SUCNR1	6	No
MYEF2	6	No
MMP1	6	No
SLC46A3	6	No
SYT4	6	No
C1orf54	6	No
FAM171B	6	No
OLR1	6	No
ABHD12B	6	No
MYBPC1	6	No
CYP4F11	6	No
SLC14A1	6	No
SMARCA1	6	No
TSPAN33	6	No
SHC3	6	No
MECOM	6	No
SDS	6	No
SCGB1D2	6	No
MAGEA4	6	No
RERGL	6	No
SLC39A2	6	No
SOX9	6	No
RGCC	6	No
PNMA3	6	No
ADCYAP1R1	6	No
RASSF10	6	No
AGT	6	No
ARL4C	6	No
ISM1	6	No
COLCA2	6	No
RND2	6	No
SHROOM3	6	Yes
FIGN	6	No
NPTX2	6	No
FBP1	6	No
WNT4	6	No
CFAP53	6	No
HORMAD1	6	No
FAM3D	6	No
TRIM44	6	No
SEMA6D	6	No
EMID1	6	No
FAM46B	6	No
RDH16	6	No
RNF208	6	No
SLC16A3	6	No
TIMP1	6	No
REG3A	6	No
KIAA1462	6	No
GPX1	6	No
FOSB	6	No
FOXF2	6	No
CXCR4	6	No
CPPED1	6	No
PRAME	6	No
KRT5	6	No
LRP1B	6	No
IGF1R	6	No
PRSS16	6	No
BACE2	6	No
DUOXA1	6	No
TMEM216	6	No
ERP27	6	No
CST3	6	No
AQP3	6	No
MMP7	6	No
CAV1	6	No
PRSS8	6	No
CCNA1	6	No
DHRS9	6	No
PLA2G1B	6	No
RBBP8	6	No
RAB34	6	No
STRA6	6	No
HMGN5	6	No
HAPLN2	6	No
OASL	6	No
CCL2	6	No
MAF	6	No
AQP5	6	No
NSUN5	6	No
ZIC5	6	No
CTSB	6	No
AOAH	6	No
POU5F1	6	No
SMCO4	6	No
RFK	6	No
C1QL4	6	No
KRT19	6	No
CTGF	6	No
SAMD5	6	No
MORN5	6	No
SCGB3A2	6	No
C6	6	No
MT1F	6	No
TRNP1	6	No
GPR162	6	No
ACPP	6	No
GDA	6	No
PRKD1	6	No
PREX2	6	No
TFPI	6	No
GALNT7	6	No
PSD2	5	No
ISG20	5	No
GAD1	5	No
RASGEF1A	5	No
BNIPL	5	No
NLGN2	5	No
RARRES1	5	No
SFRP1	5	No
FAM69C	5	No
GSTZ1	5	No
MIR22HG	5	No
KCNK1	5	No
GPC5	5	No
P4HA3	5	No
SIX1	5	No
HLA-C	5	No
RHBDL2	5	No
PPL	5	No
FAN1	5	No
LIPT2	5	No
CHKA	5	No
CLDN3	5	No
RPL39L	5	No
CD1D	5	No
GRIA3	5	No
SERPINE1	5	No
CIART	5	Yes
FREM2	4	No
ANXA13	4	No
SCN2A	4	No
CTNND2	4	No
CHAD	4	No
F13A1	4	No
MSRB2	4	No
CAPSL	4	No
IFITM10	4	No
VANGL2	4	No
MAPK8IP1	4	No
UST	4	No
DOK5	4	No
TMEM184A	4	No
TPM1	4	No
GRIK2	4	No
SPRR3	4	No
SCN3A	4	No
NUDT7	4	No
RAB41	4	No
EMILIN2	4	No
MEIS1	4	No
PTGR1	4	No
LMLN	4	No
CDX1	4	No
EPHA7	4	No
TPRG1	4	No
GAP43	4	No
MXRA5	4	No
FZD6	4	No
SLC34A2	4	No
CCDC146	4	No
PNMAL2	4	No
PPP4R4	4	No
KRTCAP3	4	No
SEMA5A	4	No
VSTM2B	4	No
SCN3B	4	No
TMPRSS5	4	No
PAG1	4	No
RARRES3	4	No
ZC2HC1A	4	No
OCIAD2	4	No
NTAN1	4	No
SLC30A1	4	Yes
DNM1	4	No
SAMD14	4	No
NKAIN4	4	No
EFS	4	No
TFF3	4	No
RHCG	4	No
UBXN8	4	No
TMEM108	4	No
KIRREL2	4	No
WTIP	4	Yes
KLK11	4	No
MKX	4	No
SLC39A11	4	No
PLAA	4	No
TFF2	4	No
NTRK2	4	No
BAK1	4	No
PLAC8	4	No
LRRC31	4	No
DPYSL5	4	No
HES1	4	No
CCK	4	No
LSR	4	No
FAM167A	4	No
PLA1A	4	No
TRAF5	4	No
HTATIP2	4	No
FUCA1	4	No
SERINC2	4	No
CCDC152	4	No
RAB38	4	No
MFSD6L	4	No
FLVCR1-AS1	4	No
IFI27	4	No
TRPS1	4	No
LMX1B	4	No
EMP1	4	No
NANOS3	4	No
MICAL3	4	No
LUZP2	4	No
PDIA2	4	No
TPPP	4	No
LGALS1	4	No
SYCP2	4	No
RAB25	4	No
RAMP1	4	No
S100P	3	No
C9orf152	3	No
CD9	3	No
PLEKHG4B	3	No
ETV1	3	No
IRX3	3	No
TNNT1	3	No
MANEAL	3	No
LGI2	3	No
EREG	3	No
CLSTN2	3	No
UNC5A	3	No
CD69	3	No
HEBP1	3	No
PRSS23	3	No
HAPLN1	3	No
SYTL2	3	No
PLCL1	3	No
LGALS3	3	No
DLK1	3	No
ULBP1	3	No
MRPL23	3	No
C1orf61	3	No
PCDHB5	3	No
ZFP92	3	No
NUP62CL	3	No
NKD2	3	No
ZNF528	3	No
SLIT2	3	No
DCDC2	3	No
MELK	3	No
LUM	3	No
AKR1C2	3	No
ABCG2	3	No
PLEKHG4	3	No
SELENBP1	3	No
RB1	3	No
LPL	3	No
FNIP2	3	No
GPR87	3	No
NPY1R	3	No
DPP4	3	No
XIST	3	No
GMFG	3	No
TSPAN1	3	No
C5orf49	3	No
CST6	3	No
DOCK10	3	No
AOX1	3	No
BEX5	2	No
NQO1	2	No
MUC6	2	No
VWDE	2	No
TMSB15A	2	No
SLC35E3	2	No
PSORS1C1	2	No
DUSP4	2	No
PLN	2	No
CCNO	2	No
CTLA4	2	No
PYCARD	2	No
CTSW	2	No
RDH10	2	No
ASNS	2	No
STEAP3	2	No
CEBPD	2	No
LRAT	2	No
PYGL	2	No
VIM	2	No
ANGPTL4	1	No
SFRP4	1	No
CD1A	1	No
RAB26	1	No
CALY	1	No
KLF2	1	No
SLC7A8	1	No
GAL3ST1	1	No
MSX2	1	No
LRP3	1	No
SYT8	1	No
MTL5	1	No
APOL1	1	No
ARID3A	1	No
GDF11	1	No
SPRR2D	1	No
HPN	1	No

[truncated: 13 more sheets: gefitinib, sunitinib, vinorelbine, docetaxel, tamoxifen, trametinib, vinblastine, erlotinib, sorafenib, gemcitabine, etoposide, cetuximab, dabrafenib]
